# ESHRE PGD Consortium data collection XIV–XV: cycles from January 2011 to December 2012 with pregnancy follow-up to October 2013<sup>†</sup>

M. De Rycke<sup>1,\*</sup>, V. Goossens<sup>2</sup>, G. Kokkali<sup>3</sup>, M. Meijer-Hoogeveen<sup>4</sup>, E. Coonen<sup>5</sup>, and C. Moutou<sup>6</sup>

<sup>1</sup>Centre for Medical Genetics, UZ Brussel, Laarbeeklaan 101, 1090 Brussels, Belgium <sup>2</sup>ESHRE Central Office, Meerstraat 60, 1852 Grimbergen, Belgium <sup>3</sup>Reproductive Medicine Unit, Genesis Athens Clinic, 14-16 Papanicoli street, Chalandri, Athens, Greece <sup>4</sup>Department of Reproductive Medicine, University Medical Center Utrecht, Heidelberglaan 100, 3584 CX, Utrecht, The Netherlands <sup>5</sup>PGD Working Group Maastricht, Department of Clinical Genetics, Maastricht University Medical Centre, PO Box 5800, 6202 AZ Maastricht, The Netherlands <sup>6</sup>Université de Strasbourg, Hôpitaux Universitaires de Strasbourg, Laboratoire de Diagnostic préimplantatoire, CMCO, 19, Rue Louis Pasteur, BP120, 67303 Schiltigheim, France

\*Correspondence address. E-mail: martine.derycke@uzbrussel.be

Submitted on June 27, 2017; accepted on July 31, 2017

**STUDY QUESTION:** How does the data collection XIV–XV of the European Society of Human Reproduction and Embryology (ESHRE) PGD Consortium compare with the cumulative data for data collections I–XIII?

**SUMMARY ANSWER:** The 14th and 15th retrospective collection represents valuable data on PGD/PGS cycles, pregnancies and children: the main trend observed is the increased application of array technology at the cost of FISH testing in PGS cycles and in PGD cycles for chromosomal abnormalities.

**WHAT IS KNOWN ALREADY:** Since 1999, the PGD Consortium has collected, analysed and published 13 previous data sets and an overview of the first 10 years of data collections.

**STUDY DESIGN, SIZE, DURATION:** Data were collected from each participating centre using a FileMaker Pro database (versions 5–12). Separate predesigned FileMaker Pro files were used for the cycles, pregnancies and baby records. The study documented cycles performed during the calendar years 2011 and 2012 and follow-up of the pregnancies and babies born which resulted from these cycles (until October 2013).

**PARTICIPANTS/MATERIALS, SETTINGS, METHOD:** Data were submitted by 71 centres (full PGD Consortium members). Records with incomplete or inconsistent data were excluded from the calculations. Corrections, calculations and tables were made by expert co-authors.

**MAIN RESULTS AND THE ROLE OF CHANCE:** For data collection XIV–XV, 71 centres reported data for 11 637 cycles with oocyte retrieval (OR), along with details of the follow-up on 2147 pregnancies and 1755 babies born. A total of 1953 cycles to OR were reported for chromosomal abnormalities, 144 cycles to OR for sexing for X-linked diseases, 3445 cycles to OR for monogenic diseases, 6095 cycles to OR for PGS and 38 cycles to OR for social sexing. From 2010 until 2012, the use of arrays for genetic testing increased from 4% to 20% in PGS and from 6% to 13% in PGD cycles for chromosomal abnormalities; the uptake of biopsy at the blastocyst stage (from <1% up to 7%) was only observed in cycles for structural chromosomal abnormalities, alongside the application of array comparative genomic hybridization.

**LIMITATIONS, REASONS FOR CAUTION:** The findings apply to the 71 participating centres and may not represent worldwide trends in PGD.

**WIDER IMPLICATIONS OF THE FINDINGS:** The annual data collections provide an important resource for data mining and for following trends in PGD/PGS practice.

<sup>†</sup>ESHRE Pages content is not externally peer reviewed. This manuscript has been approved by the Executive Committee of ESHRE.

**STUDY FUNDING/COMPETING INTEREST(S):** None.

**Key words:** PGD / PGS / fluorescence *in situ* hybridization / PCR / arrayCGH / embryo biopsy / ESHRE PGD Consortium

## Introduction

The European Society of Human Reproduction and Embryology (ESHRE) PGD Consortium was established in 1997. Its major objectives are to establish guidelines, to promote best practice and to collect data on PGD cycles, pregnancies, deliveries and children. Four guidelines on different aspects of PGD (organization of a PGD centre, FISH-based testing, amplification-based testing and biopsy) have been written (Harton *et al.*, 2011a,b,c,d). To date, 13 extensive data collections have been published, covering all applications of PGD, including monogenic diseases, HLA typing and chromosome abnormalities, PGS and social sex selection (Geraedts *et al.*, 1999, 2000; ESHRE PGD Consortium Steering Committee, 2002; Sermon *et al.*, 2005, 2007; Harper *et al.*, 2006, 2008b, 2010b; Goossens *et al.*, 2008, 2009, 2012; Moutou *et al.*, 2014; De Rycke *et al.*, 2015). An overview has been presented after 10 years of data collection (Harper *et al.*, 2012). In this 14th report, data were exceptionally collected from two consecutive calendar years instead of a single year. Data were collected from cycles carried out in 2011–2012 with follow-up of pregnancies and babies born until October 2013.

## Materials and Methods

Participating centres anonymously reported data on PGD/PGS cycles, pregnancies and babies in separate files using a FileMaker Pro database (versions 5–12). The blank FileMaker Pro files were distributed to each PGD Consortium member centre. A preliminary analysis of the submitted data allowed the identification of omissions and any ambivalent data entries. Records with incomplete or inconsistent data were excluded from the calculations. The different files were then assigned to expert co-authors for an in-depth analysis, followed by calculations and presentation of results in tables.

Clinical pregnancies were defined as the presence of one or more foetal hearts at 6 weeks of gestation. Implantation rate was defined as the number of foetal hearts per 100 embryos transferred. Delivery rate was defined as the percentage of pregnancies with delivery per oocyte retrieval procedure (OR) and per embryo transfer procedure.

## Results

Only data from centres with a full PGD Consortium membership were taken into account, as only these members can provide full information on all aspects of PGD. This report includes data from 71 centres. The results are represented in tables according to an established lay out. Accompanying text is deliberately concise and four tables are available in an electronic version only: Supplementary Tables SVIIIa (data I–XIII) and SVIIIb (data XIV–XV) list the complications of pregnancy and Supplementary Tables SXIIa (data I–XIII) and SXIIb (data XIV–XV) list the congenital malformations and the neonatal complications. Cumulative data of all cycles collected previously in data collections I–XIII can be

found in Table Ia, while an overview of the current data collection can be found in Table Ib. The data for social sexing (38 cycles) have not been reported in this last table and tables with detailed data (Tables VIa and VIb) have been omitted as well, see below. For all PGD/PGS cycles (11 637 cycles to OR), ICSI was the method most often used for fertilization (10 530/11 637, 90%). For all cycles to biopsy (11 481), zona puncturing was more commonly performed using a laser (9136/11 481, 80%) and cleavage-stage aspiration was the preferential stage/method for biopsy (8735/11 481, 76%) (Table Ib). Overall, blastocyst biopsy was reported in a minority of cases (471/11 481, 4%).

### PGD cycles for structural chromosomal abnormalities

Table IIb summarizes the 1953 cycles with OR for data collection XIV–XV. In 169 (9%) cycles, PGD for a structural chromosome abnormality was performed simultaneously with aneuploidy screening, a slight increase as compared with data XIII in which 6% of cycles had PGS as second indication. In 17 cycles, PGD was performed simultaneously for an additional structural chromosomal abnormality (16 cycles) or a monogenic indication (1 cycle).

As for all years (cumulative data shown in Table IIa), data XIV–XV showed that PGD for reciprocal translocations was performed more often than for any other type of structural chromosome abnormality (62%). For reciprocal translocations, the number of cycles performed for female carriers was very similar as that for male carriers, whereas for Robertsonian translocations (27%), the number of cycles performed for male carriers was about 1.6-fold that of female carriers.

Mean female age was 35 years, a figure that shows little variation over the years. In 80% of all cycles to OR, ICSI was used for fertilization, similar to data XIII. Nearly all cycles to OR (96%) reached the biopsy stage. The use of laser drilling for zona breaching covered 76% of all cycles. Aspiration of blastomeres from cleavage-stage embryos remained the preferred biopsy method (83% versus 89% in data collection XIII). Biopsy at the blastocyst stage was implemented for the first time (from less than 1% in data XIII up to 7% of cycles in data XIV–XV). The use of FISH as method of analysis decreased from 93% in data XIII to 85% in the current data collection, in favour of the use of array technology, which increased from 6% to 13% between 2010 and 2012.

For data XIV–XV, 24 578 oocytes were collected, a mean of 12.6 per cycle. Of these, 61% (15 056/24 578) were fertilized (2 pronuclei) and 76% (11 404/15 056) of the resulting embryos were biopsied. Of the embryos successfully biopsied, 94% (10 475/11 103) gave a diagnostic result, of which only 24% (2481/10 475) were transferable. This was in line with previous years (data I–XIII) where a mean of 13.3 oocytes per cycle were collected and 26% of diagnosed embryos were genetically transferable. As expected, the lowest percentage of transferable embryos was found in the reciprocal translocation group (19% for male or female carriers). Of all transferable embryos, 72% were actually transferred and 17% were frozen.

**Table 1a Overall cycles, data collection I–XIII.**

| Indication                    | PGD <sup>a</sup> | PGS     | Total <sup>b</sup> |
|-------------------------------|------------------|---------|--------------------|
| Cycles to OR                  | 17 721           | 26 737  | 45 163             |
| Number infertile              | 6102             | 21 420  | 27 633             |
| Cancelled before IVF/ICSI     | 53               | 3       | 56                 |
| ART method                    |                  |         |                    |
| IVF                           | 1672             | 2843    | 4684               |
| ICSI                          | 15 730           | 23 348  | 39 584             |
| IVF + ICSI                    | 89               | 404     | 499                |
| Frozen + ICSI + IVF + unknown | 189              | 89      | 302                |
| Unknown                       | 24               | 51      | 75                 |
| Cancelled after IVF/ICSI      | 759              | 481     | 1257               |
| Cycles to PGS/PGD             | 16 945           | 26 254  | 43 887             |
| Analysis method               |                  |         |                    |
| FISH                          | 7840             | 26 093  | 34 439             |
| PCR                           | 8712             | 10      | 8904               |
| FISH + PCR                    | 93               | 0       | 93                 |
| PCR + WGA                     | 196              | 0       | 196                |
| FISH + PCR + WGA              | 2                | 0       | 2                  |
| Arrays                        | 63               | 127     | 190                |
| FISH + arrays                 | 0                | 4       | 4                  |
| WGA + arrays                  | 2                | 15      | 17                 |
| Zona breaching                |                  |         |                    |
| AT drilling                   | 5332             | 6493    | 11 851             |
| Laser drilling                | 10 643           | 17 370  | 28 248             |
| Mechanical                    | 956              | 2326    | 3709               |
| Unknown                       | 14               | 65      | 79                 |
| Biopsy method                 |                  |         |                    |
| PB biopsy                     | 329              | 5239    | 5568               |
| Cleavage aspiration           | 15726            | 19821   | 35728              |
| Cleavage extrusion            | 576              | 1005    | 2087               |
| Cleavage flow displacement    | 16               | 22      | 38                 |
| Blastocyst                    | 142              | 54      | 197                |
| PB and cleavage               | 82               | 26      | 108                |
| Unknown                       | 16               | 52      | 68                 |
| Embryology                    |                  |         |                    |
| COCs                          | 234 850          | 300 194 | 544 803            |
| Inseminated                   | 197 272          | 248 433 | 453 851            |
| Fertilized                    | 139 790          | 173 325 | 318 828            |
| Biopsied                      | 108 478          | 141 722 | 254 725            |
| Successfully biopsied         | 106 980          | 140 523 | 251 885            |
| Diagnosed                     | 97 497           | 131 267 | 232 691            |
| Transferable                  | 36 107           | 45 090  | 82 730             |
| Transferred                   | 22 121           | 33 335  | 56 491             |
| Frozen                        | 6191             | 6090    | 12 650             |
| Clinical outcome              |                  |         |                    |
| Cycles to ET                  | 12 785           | 19 117  | 32 420             |

*Continued***Table 1a Continued**

| Indication                                  | PGD <sup>a</sup> | PGS   | Total <sup>b</sup> |
|---------------------------------------------|------------------|-------|--------------------|
| hCG positive                                | 4742             | 6768  | 11 713             |
| Positive heartbeat                          | 3755             | 5350  | 9253               |
| Clinical pregnancy rate (% per OR/% per ET) | 21/29            | 20/28 | 20/29              |

OR, oocyte retrieval; AT, acid Tyrode's; COC, cumulus oocyte complexes; SS, social sexing; WGA, whole genome amplification; ET, embryo transfer; PB, polar body.

<sup>a</sup>PGD column includes PGD for chromosomal abnormalities, sexing for X-linked disease and PGD for single gene disorders.

<sup>b</sup>Total includes PGD and PGS for data I–XIII, as well as social sexing cycles for data I–XII (705 cycles). From data XIII onwards, details of social sexing cycles were no longer reported.

From 1953 cycles to OR, only 61% resulted in an embryo transfer procedure. This is in agreement with previous data (embryo transfer in 64% of cycles to OR; data I–XIII 4450/6968) showing that a high level of chromosomally abnormal embryos is found in patients carrying chromosomal abnormalities.

A positive hCG was obtained in 478 cycles, with a positive heartbeat in 372 cycles (19% per OR and 31% per embryo transfer). The poorest outcome, 12% positive heartbeat per OR, was found in the group of deletion carriers. This is linked with the lowest percentage of transferable embryos available for this group. Overall, the implantation rate was 24% (419/1776) and the delivery rate was 15% per OR (287/1953) and 24% per embryo transfer procedure (287/1196). There were 57 miscarriages and 28 clinical pregnancies were lost to follow-up. Implantation and delivery rates have remained stable over the last years: the clinical pregnancy rate for data I–XIII is 18% per OR and 28% per embryo transfer procedure.

### PGD cycles for sexing for X-linked diseases

Tables IIIa and IIIb summarize the 1484 and 144 cycles to OR collected for data collections I–XIII and XIV–XV, respectively. As holds true for the PGD cycles for a chromosomal abnormality, the majority of cycles for X-linked diseases was performed with ICSI (66%), laser drilling (86%) and biopsy by cleavage-stage aspiration (91%). FISH was still the most frequently used method (78% of cycles); PCR was applied in 15% and whole genome amplification/arrays in 6% of cycles.

For data XIV–XV, 1616 oocytes were collected (a mean of 11.2 per OR), 70% (990/1424) of inseminated oocytes were fertilized and 79% (785/990) of the resulting embryos were biopsied. Of the embryos successfully biopsied, 96% (728/759) gave a diagnostic result, of which only 35% (255/728) were transferable. From 255 transferable embryos, 148 were actually transferred in 107 cycles (74% of cycles to OR). A positive hCG was obtained in 50 cycles, with a positive heartbeat in 40 cycles. This yielded a clinical pregnancy rate of 28% per OR and 37% per embryo transfer, which was a better result in comparison to the cumulative data I–XIII (20% per OR and 26% per ET). This gave an implantation rate of 27% (40/148). Finally, the delivery rate was 20% per OR (29/144) and 27% per embryo transfer (29/107). There were two miscarriages and nine clinical pregnancies were lost to follow-up.

**Table 1b Overall cycle data collection XIV–XV.**

| Indication                                               | PGD    | PGS    | Total               |
|----------------------------------------------------------|--------|--------|---------------------|
| Cycles to OR                                             | 5542   | 6095   | 11 637 <sup>a</sup> |
| Number infertile                                         | 1753   | 3420   | 5173                |
| Female age (years)                                       | 34     | 39     | 36                  |
| Cancelled before IVF/ICSI                                | 0      | 0      | 0                   |
| ART method                                               |        |        |                     |
| IVF                                                      | 388    | 545    | 933                 |
| ICSI                                                     | 5054   | 5476   | 10 530              |
| IVF + ICSI                                               | 8      | 45     | 53                  |
| Frozen + ICSI/IVF                                        | 84     | 15     | 99                  |
| Unknown                                                  | 2      | 14     | 16                  |
| Cancelled after IVF/ICSI                                 | 123    | 27     | 150                 |
| Cycles to PGS/PGD                                        | 5413   | 6068   | 11 481              |
| Analysis method                                          |        |        |                     |
| FISH                                                     | 1628   | 4157   | 5785                |
| PCR                                                      | 3470   | 3      | 3473                |
| WGA                                                      | 267    | 640    | 907                 |
| Arrays                                                   | 246    | 1225   | 1471                |
| Zona breaching                                           |        |        |                     |
| AT drilling                                              | 552    | 547    | 1099                |
| laser drilling                                           | 4290   | 4846   | 9136                |
| Mechanical                                               | 571    | 675    | 1246                |
| Biopsy method                                            |        |        |                     |
| PB biopsy                                                | 166    | 1730   | 1896                |
| Cleavage aspiration                                      | 4867   | 3868   | 8735                |
| Cleavage extrusion                                       | 123    | 174    | 297                 |
| Cleavage low displacement                                |        | 21     | 21                  |
| Blastocyst                                               | 206    | 265    | 471                 |
| PB and embryo                                            | 51     | 10     | 61                  |
| Embryology                                               |        |        |                     |
| COCs                                                     | 70 965 | 61 794 | 132 754             |
| Inseminated                                              | 58 763 | 52 494 | 111 257             |
| Fertilized                                               | 44 047 | 38 510 | 82 557              |
| Biopsied                                                 | 34 229 | 30 166 | 64 395              |
| Successfully biopsied                                    | 33 344 | 30 044 | 63 388              |
| Diagnosed                                                | 30 811 | 28 745 | 59 556              |
| Transferred                                              | 6277   | 5718   | 11 995              |
| Frozen                                                   | 2888   | 1371   | 4259                |
| Clinical outcome                                         |        |        |                     |
| Cycles to ET                                             | 4025   | 3763   | 7788                |
| hCG positive                                             | 1610   | 1488   | 3098                |
| Positive heartbeat                                       | 1246   | 1261   | 2507                |
| Clinical pregnancy rate<br>(% per OR/% per ET)           | 22/31  | 21/34  | 22/32               |
| Number foetal heartbeats                                 | 1464   | 1446   | 2910                |
| Implantation rate<br>(foetal hearts/embryos transferred) | 23     | 25     | 24                  |
| Deliveries                                               | 1019   | 816    | 1835                |

*Continued***Table 1b Continued**

| Indication                                                    | PGD   | PGS   | Total |
|---------------------------------------------------------------|-------|-------|-------|
| Delivery rate (% per OR/per ET)                               | 18/25 | 13/22 | 16/24 |
| Miscarriages                                                  | 145   | 214   | 359   |
| Miscarriage rate (% per clinical pregn –<br>pregn lost to FU) | 12    | 20    | 16    |
| Clinical pregnancies lost to FU                               | 82    | 231   | 313   |

PGS, preimplantation genetic screening; FISH, fluorescence *in situ* hybridization; PCR, polymerase chain reaction; ART assisted reproduction technology; FU, follow-up.

PGD column includes PGD for chromosome abnormalities, sexing for X-linked disease and PGD for monogenic disorders.

<sup>a</sup>38 cycles for social sexing have not been included in this table.

### PGD cycles for monogenic diseases

Tables IVa and IVb summarize the 9267 and 3445 cycles to OR collected for data collection I–XIII and XIV–XV, respectively. For data XIV–XV, ICSI was used in the majority of cycles (99% of cycles to OR) and PCR was still the most widely used first-line method of DNA amplification (93%). The use of laser was the preferred method for biopsy (81% of cycles to PGD); acidic Tyrode's or mechanical action was applied in 8% and 11% of cycles to PGD, respectively (versus 15% and 10% respectively in data XIII). These results indicate that the application of mechanical biopsy remained constant whereas the use of acidic Tyrode's has decreased in favour of laser. Day 3 cleavage-stage embryo biopsy was most frequently used (93% of cycles to PGD) while the use of blastocyst biopsy remained low (2%). These results were very similar to the previous data collection. Genetic testing was carried out on either one blastomere (58% of cycles to PGD with Day 3 biopsy) or two blastomeres per embryo (28% of cycles to PGD with Day 3 biopsy). This is an improvement compared to the previous data collection, with 43% of 1-cell biopsy cycles and 37% of 2-cell biopsy cycles. A total number of 44 771 cumulus oocyte complexes (COC) were collected and 76% of mature oocytes that were injected actually fertilized. A total of 79% of fertilized embryos were biopsied with a 97% success rate. Of the embryos successfully biopsied, 91% gave a diagnostic result. From 3402 PGD procedures, 80% resulted in an embryo transfer. Per cycle to OR on average 13.0 COCs were collected with 10.7 mature oocytes for injection. This yielded on average 8.1 fertilized embryos. Per PGD cycle on average 6.5 embryos were suitable for biopsy. Diagnosis was achieved for 5.8 embryos. On average 1.3 embryos were transferred while 0.7 embryos were used for cryopreservation, which was very similar to data XIII. A positive hCG was obtained in 1082 cycles, with a positive heartbeat in 834 cycles (25% per OR and 31% per embryo transfer) and this corresponded well with the results from the cumulative data I–XIII (24% per OR and 30% per embryo transfer). There were 1005 foetal hearts, giving an overall implantation rate of 23% (1005/4353). Finally, the delivery rate was 20% per OR and 26% per embryo transfer. There were 86 (11%) miscarriages and 45 clinical pregnancies were lost to follow-up, which is in line with previous data as well.

**Table IIa** PGD for chromosomal abnormalities, data collection I–XIII.

| Indication                                   | Robertsonian translocation male carrier | Robertsonian translocation female carrier | Reciprocal translocation male carrier | Reciprocal translocation female carrier | Other  | Total  |
|----------------------------------------------|-----------------------------------------|-------------------------------------------|---------------------------------------|-----------------------------------------|--------|--------|
| Cycles to OR                                 | 1262                                    | 731                                       | 1939                                  | 2101                                    | 935    | 6968   |
| Number infertile                             | 938                                     | 333                                       | 1033                                  | 879                                     | 608    | 3791   |
| Female age (years)                           | 35                                      | 33                                        | 34                                    | 33                                      | 34     | 34     |
| Cancelled before IVF/ICSI                    | 0                                       | 0                                         | 5                                     | 2                                       | 9      | 16     |
| ART method                                   |                                         |                                           |                                       |                                         |        |        |
| IVF                                          | 54                                      | 126                                       | 332                                   | 563                                     | 123    | 1198   |
| ICSI                                         | 1185                                    | 583                                       | 1549                                  | 1484                                    | 787    | 5588   |
| IVF + ICSI                                   | 6                                       | 12                                        | 17                                    | 20                                      | 8      | 63     |
| Frozen + ICSI + IVF + unknown                | 17                                      | 10                                        | 36                                    | 32                                      | 8      | 103    |
| Cancelled after IVF/ICSI                     | 61                                      | 28                                        | 102                                   | 117                                     | 52     | 360    |
| Cycles to PGD                                | 1201                                    | 703                                       | 1832                                  | 1982                                    | 874    | 6592   |
| Zona breaching                               |                                         |                                           |                                       |                                         |        |        |
| AT drilling                                  | 415                                     | 292                                       | 764                                   | 842                                     | 301    | 2614   |
| Laser drilling                               | 756                                     | 389                                       | 1007                                  | 1064                                    | 501    | 3717   |
| Mechanical                                   | 30                                      | 22                                        | 61                                    | 76                                      | 72     | 261    |
| Biopsy method                                |                                         |                                           |                                       |                                         |        |        |
| PB biopsy                                    | 3                                       | 23                                        | 2                                     | 56                                      | 8      | 92     |
| Cleavage aspiration                          | 1130                                    | 627                                       | 1710                                  | 1786                                    | 817    | 6070   |
| Cleavage extrusion                           | 60                                      | 52                                        | 104                                   | 125                                     | 44     | 385    |
| Cleavage flow displacement                   | 2                                       | 0                                         | 2                                     | 4                                       | 3      | 11     |
| Blastocyst                                   | 5                                       | 1                                         | 14                                    | 10                                      | 2      | 32     |
| PB + embryo                                  | 1                                       | 0                                         | 0                                     | 1                                       | 0      | 2      |
| Embryology                                   |                                         |                                           |                                       |                                         |        |        |
| COCs                                         | 17 328                                  | 10 100                                    | 26 020                                | 27 946                                  | 11 567 | 92 961 |
| Inseminated                                  | 14 424                                  | 8595                                      | 22 183                                | 24 186                                  | 9700   | 79 088 |
| Fertilized                                   | 9815                                    | 6262                                      | 15 856                                | 17 663                                  | 6950   | 56 546 |
| Biopsied                                     | 7005                                    | 4780                                      | 12 126                                | 13 816                                  | 5239   | 42 966 |
| Successfully biopsied                        | 6922                                    | 4723                                      | 11 972                                | 13 640                                  | 5186   | 42 443 |
| Diagnosed                                    | 6367                                    | 4376                                      | 11 172                                | 12 788                                  | 4810   | 39 513 |
| Transferable                                 | 2440                                    | 1289                                      | 2254                                  | 2427                                    | 1776   | 10 186 |
| Transferred                                  | 1584                                    | 902                                       | 1779                                  | 1920                                    | 1194   | 7379   |
| Frozen                                       | 363                                     | 158                                       | 219                                   | 194                                     | 223    | 1157   |
| Clinical outcome                             |                                         |                                           |                                       |                                         |        |        |
| Cycles to ET                                 | 926                                     | 523                                       | 1133                                  | 1194                                    | 674    | 4450   |
| hCG positive                                 | 363                                     | 189                                       | 412                                   | 412                                     | 220    | 1596   |
| Positive heartbeat                           | 305                                     | 151                                       | 310                                   | 323                                     | 174    | 1263   |
| Clinical pregnancy rate (% per OR, % per ET) | 24/33                                   | 21/29                                     | 16/27                                 | 15/27                                   | 19/26  | 18/28  |

## Preimplantation genetic screening

Overall, 6095 PGS cycles were reported in data collection XIV–XV (Table Vb). The mean age of women undergoing PGS was 39 years, which is the same as in data collection XIII but slightly higher than the mean age of 37 years observed in the cumulative data of previous collections I–XIII (Table Va). The most common indications for PGS were advanced maternal age (40%), repeated implantation failure (12%) as a

single indication or in combination either with advanced maternal age (12%) or with recurrent miscarriage (10%) and severe male factor (9%). Other indications were previous abnormal pregnancies, individuals with abnormal karyotypes, including mosaicism for numerical chromosomal abnormalities and couples with more than one indication. A small number of couples underwent PGS following oocyte donation or without a reported medical indication.

**Table IIb PGD for chromosomal abnormalities, data collection XIV–XV.**

| Indication                          | Robertsonian translocation male carrier <sup>a</sup> |      | Robertsonian translocation female carrier <sup>b</sup> |      | Reciprocal translocation male carrier <sup>c</sup> |      | Reciprocal translocation female carrier <sup>d</sup> |      | Deletion <sup>e</sup> |     | Inversion <sup>f</sup> |      | Other chromosomal abnormalities |      | Other <sup>g</sup> |      | Total    |      |
|-------------------------------------|------------------------------------------------------|------|--------------------------------------------------------|------|----------------------------------------------------|------|------------------------------------------------------|------|-----------------------|-----|------------------------|------|---------------------------------|------|--------------------|------|----------|------|
| Cycles to OR                        | 326                                                  |      | 198                                                    |      | 603                                                |      | 604                                                  |      | 42                    |     | 85                     |      | 77                              |      | 18                 |      | 1953     |      |
| Number infertile (%)                | 204 (63)                                             |      | 65 (35)                                                |      | 292 (48)                                           |      | 243 (40)                                             |      | 26 (62)               |     | 42 (49)                |      | 41 (53)                         |      | 11                 |      | 923 (47) |      |
| Female age (years)                  | 37.3                                                 |      | 34.6                                                   |      | 34.3                                               |      | 34.6                                                 |      | 32.9                  |     | 35.3                   |      | 35.1                            |      | 35.7               |      | 35.0     |      |
| Cancelled after OR before IVF/ICSI  | 1                                                    |      | 0                                                      |      | 5                                                  |      | 0                                                    |      | 0                     |     | 0                      |      | 0                               |      | 0                  |      | 6        |      |
| ART method                          |                                                      |      |                                                        |      |                                                    |      |                                                      |      |                       |     |                        |      |                                 |      |                    |      |          |      |
| IVF                                 | 13                                                   |      | 32                                                     |      | 78                                                 |      | 157                                                  |      | 13                    |     | 7                      |      | 9                               |      | 0                  |      | 309      |      |
| ICSI                                | 303                                                  |      | 157                                                    |      | 488                                                |      | 419                                                  |      | 29                    |     | 78                     |      | 67                              |      | 17                 |      | 1558     |      |
| IVF + ICSI                          | 1                                                    |      | 0                                                      |      | 5                                                  |      | 1                                                    |      | 0                     |     | 0                      |      | 1                               |      | 0                  |      | 8        |      |
| IVF + frozen                        | 1                                                    |      | 1                                                      |      | 3                                                  |      | 4                                                    |      | 0                     |     | 0                      |      | 0                               |      | 0                  |      | 9        |      |
| ICSI + frozen                       | 7                                                    |      | 8                                                      |      | 22                                                 |      | 23                                                   |      | 0                     |     | 0                      |      | 0                               |      | 1                  |      | 61       |      |
| Unknown                             | 0                                                    |      | 0                                                      |      | 2                                                  |      | 0                                                    |      | 0                     |     | 0                      |      | 0                               |      | 0                  |      | 2        |      |
| Cancelled after IVF/ICSI            | 18                                                   |      | 6                                                      |      | 26                                                 |      | 21                                                   |      | 3                     |     | 5                      |      | 1                               |      | 0                  |      | 80       |      |
| Cycles to PGD                       | 307                                                  |      | 192                                                    |      | 572                                                |      | 583                                                  |      | 39                    |     | 80                     |      | 76                              |      | 18                 |      | 1867     |      |
| Zona breaching                      |                                                      |      |                                                        |      |                                                    |      |                                                      |      |                       |     |                        |      |                                 |      |                    |      |          |      |
| AT drilling                         | 39                                                   |      | 36                                                     |      | 76                                                 |      | 107                                                  |      | 3                     |     | 15                     |      | 7                               |      | 1                  |      | 284      |      |
| Laser drilling                      | 247                                                  |      | 141                                                    |      | 437                                                |      | 419                                                  |      | 35                    |     | 65                     |      | 65                              |      | 16                 |      | 1425     |      |
| Mechanical                          | 21                                                   |      | 15                                                     |      | 59                                                 |      | 57                                                   |      | 1                     |     | 0                      |      | 4                               |      | 1                  |      | 158      |      |
| Biopsy method                       |                                                      |      |                                                        |      |                                                    |      |                                                      |      |                       |     |                        |      |                                 |      |                    |      |          |      |
| PB                                  | 1                                                    |      | 34                                                     |      | 0                                                  |      | 19                                                   |      | 0                     |     | 1                      |      | 1                               |      | 0                  |      | 56       |      |
| Cleavage aspiration                 | 274                                                  |      | 139                                                    |      | 489                                                |      | 486                                                  |      | 36                    |     | 69                     |      | 58                              |      | 7                  |      | 1558     |      |
| Cleavage extrusion                  | 11                                                   |      | 8                                                      |      | 35                                                 |      | 44                                                   |      | 3                     |     | 0                      |      | 10                              |      | 1                  |      | 112      |      |
| Blastocyst                          | 20                                                   |      | 10                                                     |      | 48                                                 |      | 31                                                   |      | 0                     |     | 10                     |      | 7                               |      | 10                 |      | 136      |      |
| PB + embryo                         | 1                                                    |      | 1                                                      |      | 0                                                  |      | 3                                                    |      | 0                     |     | 0                      |      | 0                               |      | 0                  |      | 5        |      |
| Analysis technique                  |                                                      |      |                                                        |      |                                                    |      |                                                      |      |                       |     |                        |      |                                 |      |                    |      |          |      |
| FISH                                | 259                                                  |      | 138                                                    |      | 498                                                |      | 514                                                  |      | 38                    |     | 68                     |      | 71                              |      | 3                  |      | 1589     |      |
| PCR                                 | 5                                                    |      | 9                                                      |      | 13                                                 |      | 6                                                    |      | 0                     |     | 0                      |      | 3                               |      | 4                  |      | 40       |      |
| WGA/array                           | 43                                                   |      | 45                                                     |      | 61                                                 |      | 63                                                   |      | 1                     |     | 12                     |      | 2                               |      | 11                 |      | 238      |      |
| Embryology                          |                                                      |      |                                                        |      |                                                    |      |                                                      |      |                       |     |                        |      |                                 |      |                    |      |          |      |
| COCs (mean/OR)                      | 4027                                                 | 12.4 | 2453                                                   | 12.4 | 7828                                               | 13.0 | 7569                                                 | 12.5 | 336                   | 8.0 | 1239                   | 14.6 | 920                             | 11.9 | 206                | 11.4 | 24 578   | 12.6 |
| Inseminated (mean/OR)               | 3312                                                 | 10.2 | 2041                                                   | 10.3 | 6554                                               | 10.9 | 6490                                                 | 10.7 | 279                   | 6.6 | 1033                   | 12.1 | 778                             | 10.1 | 150                | 8.3  | 20 637   | 10.6 |
| Fertilized (mean/OR)                | 2225                                                 | 6.8  | 1541                                                   | 7.8  | 4787                                               | 7.9  | 4835                                                 | 8.0  | 199                   | 4.7 | 772                    | 9.1  | 575                             | 7.5  | 122                | 6.8  | 15 056   | 7.7  |
| Biopsied (mean/biopsy)              | 1641                                                 | 5.3  | 1299                                                   | 6.8  | 3584                                               | 6.3  | 3667                                                 | 6.3  | 147                   | 3.8 | 557                    | 6.9  | 421                             | 5.5  | 88                 | 4.9  | 11 404   | 5.8  |
| Successfully biopsied (mean/biopsy) | 1588                                                 | 5.2  | 1212                                                   | 6.3  | 3519                                               | 6.1  | 3597                                                 | 6.2  | 143                   | 3.7 | 552                    | 6.9  | 404                             | 5.3  | 88                 | 4.9  | 11 103   | 5.7  |
| Diagnosed (mean/biopsy)             | 1487                                                 | 4.8  | 1138                                                   | 5.9  | 3309                                               | 5.8  | 3397                                                 | 5.8  | 138                   | 3.5 | 530                    | 6.6  | 392                             | 5.2  | 84                 | 4.7  | 10 475   | 5.6  |

Continued

**Table IIb** *Continued*

| Indication                                                     | Robertsonian translocation male carrier <sup>a</sup> |     | Robertsonian translocation female carrier <sup>b</sup> |     | Reciprocal translocation male carrier <sup>c</sup> |     | Reciprocal translocation female carrier <sup>d</sup> |     | Deletion <sup>e</sup> |     | Inversion <sup>f</sup> |     | Other chromosomal abnormalities |     | Other <sup>g</sup> |     | Total |     |
|----------------------------------------------------------------|------------------------------------------------------|-----|--------------------------------------------------------|-----|----------------------------------------------------|-----|------------------------------------------------------|-----|-----------------------|-----|------------------------|-----|---------------------------------|-----|--------------------|-----|-------|-----|
| Transferable (%/diagnosed)                                     | 560                                                  | 38% | 300                                                    | 26% | 624                                                | 19% | 636                                                  | 19% | 38                    | 27% | 169                    | 32% | 133                             | 34% | 21                 | 25% | 2481  | 24% |
| Transferred                                                    | 362                                                  |     | 212                                                    |     | 474                                                |     | 502                                                  |     | 25                    |     | 96                     |     | 90                              |     | 15                 |     | 1776  |     |
| Frozen                                                         | 93                                                   |     | 50                                                     |     | 120                                                |     | 92                                                   |     | 4                     |     | 34                     |     | 24                              |     | 6                  |     | 423   |     |
| Clinical outcome                                               |                                                      |     |                                                        |     |                                                    |     |                                                      |     |                       |     |                        |     |                                 |     |                    |     |       |     |
| Cycles to ET (%/OPU)                                           | 225                                                  | 69  | 129                                                    | 65  | 340                                                | 56  | 349                                                  | 58  | 23                    | 55  | 62                     | 73  | 58                              | 75  | 10                 | 56  | 1196  | 61  |
| hCG positive                                                   | 83                                                   |     | 54                                                     |     | 146                                                |     | 137                                                  |     | 8                     |     | 20                     |     | 25                              |     | 5                  |     | 478   |     |
| Positive heartbeat                                             | 64                                                   |     | 46                                                     |     | 117                                                |     | 107                                                  |     | 5                     |     | 13                     |     | 16                              |     | 4                  |     | 372   |     |
| Clinical pregnancy rate<br>(% per OR/% per ET)                 | 20                                                   | 28  | 23                                                     | 36  | 19                                                 | 34  | 18                                                   | 31  | 12                    | 22  | 15                     | 21  | 21                              | 28  | 22                 | 40  | 19    | 31  |
| Number of foetal hearts                                        | 80                                                   |     | 49                                                     |     | 130                                                |     | 119                                                  |     | 5                     |     | 14                     |     | 17                              |     | 5                  |     | 419   |     |
| Implantation rate<br>(% foetal hearts/100 embryos transferred) | 22                                                   |     | 23                                                     |     | 27                                                 |     | 24                                                   |     | 20                    |     | 15                     |     | 19                              |     | 33                 |     | 24    |     |
| Deliveries                                                     | 41                                                   |     | 36                                                     |     | 92                                                 |     | 89                                                   |     | 2                     |     | 9                      |     | 14                              |     | 4                  |     | 287   |     |
| Miscarriages                                                   | 13                                                   |     | 6                                                      |     | 20                                                 |     | 11                                                   |     | 3                     |     | 2                      |     | 2                               |     | 0                  |     | 57    |     |
| Lost to FU                                                     | 10                                                   |     | 4                                                      |     | 5                                                  |     | 7                                                    |     | 0                     |     | 2                      |     | 0                               |     | 0                  |     | 28    |     |

<sup>a</sup>Second indication PGS (*n* = 30), reciprocal male carrier (*n* = 1).<sup>b</sup>Second indication PGS (*n* = 31).<sup>c</sup>Second indication PGS (*n* = 45), robertsonian male carrier (*n* = 3), inversion (*n* = 5), monogenic disease (*n* = 1).<sup>d</sup>Second indication PGS (*n* = 31), robertsonian male carrier (*n* = 3), inversion (*n* = 3).<sup>e</sup>Second indication PGS (*n* = 3).<sup>f</sup>Second indication PGS (*n* = 29), reciprocal female carrier (*n* = 1).<sup>g</sup>18 cycles for translocations of unknown carrier gender.

**Table IIIa Sexing only for X-linked disease, data collection I–XIII.**

|                                             | Total  |
|---------------------------------------------|--------|
| Cycles to OR                                | 1484   |
| Number infertile                            | 336    |
| Female age                                  | 32     |
| Cancelled before IVF/ICSI                   | 2      |
| ART method                                  |        |
| IVF                                         | 423    |
| ICSI                                        | 1038   |
| IVF + ICSI                                  | 14     |
| ICSI + Frozen                               | 5      |
| IVF + Frozen                                | 2      |
| Cancelled after IVF/ICSI                    | 74     |
| Cycles to PGD                               | 1408   |
| Zona breaching                              |        |
| AT drilling                                 | 644    |
| Laser drilling                              | 686    |
| Mechanical                                  | 78     |
| Biopsy method                               | 0      |
| PB                                          | 2      |
| Cleavage aspiration                         | 1328   |
| Cleavage extrusion                          | 69     |
| Flow displacement                           | 5      |
| Blastocyst                                  | 4      |
| Embryology                                  |        |
| COCs                                        | 19 163 |
| Inseminated                                 | 16 765 |
| Fertilized                                  | 11 911 |
| Biopsied                                    | 9100   |
| Successfully biopsied                       | 8893   |
| Diagnosed                                   | 8191   |
| Transferable                                | 2849   |
| Transferred                                 | 1934   |
| Frozen                                      | 545    |
| Clinical outcome                            |        |
| Cycles to ET                                | 1112   |
| hCG positive                                | 372    |
| Positive heartbeat                          | 290    |
| Clinical pregnancy rate (% per OR/% per ET) | 20/26  |

The majority of biopsies (67%) were performed at cleavage stage; blastocyst biopsy was carried out in only 4% of cycles. Laser biopsy was the preferred method (80%); acidic Tyrode's or mechanical zona breaching was applied in 9% and 11% of cycles to PGS, respectively. For the genetic analysis FISH was used in 68% of cases while arrays were used in 20% of cases (Table 1b); in data collection XIII only 4% of PGS cycles were carried out with arrays. This indicates the onset of a more

**Table IIIb Sexing only for X-linked disease, data collection XIV–XV.**

|                                                                 | Total       |
|-----------------------------------------------------------------|-------------|
| Cycles to OR                                                    | 144         |
| Number infertile (% OR)                                         | 49 (34%)    |
| Female age (years)                                              | 33          |
| ART method                                                      |             |
| IVF                                                             | 48          |
| ICSI                                                            | 95          |
| IVF + frozen                                                    | 1           |
| Cancelled after IVF/ICSI                                        | -           |
| Cycles to PGD                                                   | 144         |
| Zona breaching                                                  |             |
| AT drilling                                                     | 7           |
| Laser drilling                                                  | 124         |
| Mechanical                                                      | 13          |
| Biopsy method                                                   |             |
| Cleavage aspiration                                             | 131         |
| Cleavage extrusion                                              | 10          |
| Blastocyst                                                      | 3           |
| Analysis method                                                 |             |
| FISH                                                            | 113         |
| PCR                                                             | 22          |
| WGA/array                                                       | 9           |
| Embryology                                                      |             |
| COCs (mean/OR)                                                  | 1616 (11,2) |
| Inseminated (mean/OR)                                           | 1424 (9,9)  |
| Fertilized (mean/OR)                                            | 990 (6,9)   |
| Biopsied (mean/biopsy)                                          | 785 (5,5)   |
| Successfully biopsied (mean/biopsy)                             | 759 (5,3)   |
| Diagnosed (mean/biopsy)                                         | 728 (5,1)   |
| Transferable                                                    | 255         |
| Transferred                                                     | 148         |
| Frozen                                                          | 80          |
| Clinical outcome                                                |             |
| Cycles to ET (%/OR)                                             | 107 (74)    |
| hCG positive                                                    | 50          |
| Positive heartbeat                                              | 40          |
| Clinical pregnancy rate (% per OR/% per ET)                     | 28/37       |
| Number foetal hearts                                            | 40          |
| % Implantation rate (foetal heartbeats/100 embryos transferred) | 27          |
| Deliveries                                                      | 29          |
| Delivery rate (% per OR/% per ET)                               | 20/27       |
| Miscarriages                                                    | 2           |
| Miscarriage rate (% per clinical pregn – pregn lost to FU)      | 6           |
| Clinical pregnancies lost to FU                                 | 9           |

**Table IVa** Cycles performed for single gene disorders, data collection I–XIII.

| Indication                                  | X-linked | Autosomal recessive | Autosomal dominant | HLA      |                         | Other  | Total   |
|---------------------------------------------|----------|---------------------|--------------------|----------|-------------------------|--------|---------|
|                                             |          |                     |                    | HLA only | HLA + monogenic disease |        |         |
| Cycles to OR                                | 1330     | 2838                | 3114               | 174      | 469                     | 1342   | 9267    |
| Number infertile                            | 258      | 901                 | 554                | 2        | 21                      | 239    | 1975    |
| Female age (years)                          | 32       | 34                  | 32                 | 35       | 34                      | 31     | 33      |
| Cancelled before IVF/ICSI                   | 0        | 0                   | 3                  | 0        | 0                       | 1      | 4       |
| Art method                                  |          |                     |                    |          |                         |        |         |
| IVF                                         | 17       | 21                  | 2                  | 0        | 0                       | 12     | 52      |
| ICSI                                        | 1298     | 2773                | 3084               | 169      | 458                     | 1317   | 9099    |
| IVF + ICSI                                  | 3        | 2                   | 4                  | 2        | 1                       | 0      | 12      |
| IVF + frozen                                | 0        | 0                   | 1                  | 0        | 0                       | 0      | 1       |
| ICSI + frozen                               | 4        | 14                  | 8                  | 0        | 4                       | 0      | 30      |
| IVF+ICSI + Frozen                           | 6        | 21                  | 6                  | 1        | 6                       | 9      | 49      |
| Unknown                                     | 2        | 7                   | 6                  | 2        | 0                       | 5      | 22      |
| Cancelled after IVF/ICSI                    | 47       | 97                  | 106                | 6        | 12                      | 54     | 322     |
| Cycles to PGD                               | 1283     | 2741                | 3005               | 168      | 457                     | 1289   | 8943    |
| Zona breaching                              |          |                     |                    |          |                         |        |         |
| AT drilling                                 | 266      | 773                 | 679                | 4        | 38                      | 318    | 2078    |
| Laser drilling                              | 888      | 1770                | 2142               | 161      | 404                     | 868    | 6233    |
| Mechanical                                  | 127      | 194                 | 179                | 3        | 15                      | 100    | 618     |
| Unknown                                     | 2        | 4                   | 5                  | 0        | 0                       | 3      | 14      |
| Biopsy method                               |          |                     |                    |          |                         |        |         |
| PB biopsy                                   | 51       | 50                  | 71                 | 0        | 0                       | 63     | 235     |
| Cleavage aspiration                         | 1185     | 2552                | 2866               | 145      | 421                     | 1155   | 8324    |
| Cleavage extrusion                          | 9        | 87                  | 45                 | 10       | 8                       | 32     | 191     |
| Blastocyst                                  | 7        | 39                  | 8                  | 13       | 29                      | 11     | 107     |
| PB + embryo                                 | 30       | 10                  | 11                 | 0        | 0                       | 25     | 76      |
| Unknown                                     | 3        | 7                   | 5                  | 0        | 0                       | 6      | 21      |
| Embryology                                  |          |                     |                    |          |                         |        |         |
| COCs                                        | 15 712   | 38 582              | 40 703             | 2423     | 6697                    | 18 603 | 122 720 |
| Inseminated                                 | 13 142   | 31 716              | 33 751             | 1940     | 5487                    | 15 382 | 101 418 |
| Fertilized                                  | 9924     | 23 410              | 2201               | 1571     | 4471                    | 11 315 | 75 892  |
| Biopsied                                    | 7120     | 17 960              | 18 313             | 1200     | 3615                    | 8203   | 56 411  |
| Successfully biopsied                       | 6997     | 17 674              | 18 073             | 1196     | 3590                    | 8113   | 55 643  |
| Diagnosed                                   | 6312     | 15 596              | 16 286             | 1099     | 3282                    | 7217   | 49 792  |
| Transferable                                | 3160     | 8832                | 6876               | 213      | 508                     | 3487   | 23 076  |
| Transferred                                 | 1765     | 4695                | 3807               | 155      | 396                     | 1990   | 12 808  |
| Frozen                                      | 545      | 1685                | 1190               | 84       | 378                     | 609    | 4491    |
| Clinical outcome                            |          |                     |                    |          |                         |        |         |
| Cycles to ET                                | 1002     | 2396                | 2402               | 105      | 259                     | 1058   | 7222    |
| hCG positive                                | 364      | 977                 | 878                | 39       | 115                     | 401    | 2774    |
| Positive heartbeat                          | 294      | 776                 | 684                | 30       | 100                     | 318    | 2202    |
| Clinical pregnancy rate (% per OR/% per ET) | 22/29    | 27/32               | 22/28              | 17/29    | 21/39                   | 24/30  | 24/30   |

widespread implementation of array comparative genomic hybridization (CGH), but is not yet linked with an uptake of blastocyst biopsy. From a total of 52 494 oocytes that were inseminated, 38 510 (73%) were

fertilized. Of 30 044 embryos that were successfully biopsied, 28 745 resulted in a diagnosis (55% of all oocytes inseminated and 96% of all embryos successfully biopsied). Of these 28% were genetically

**Table IVb** Cycles performed for single gene disorders using PCR, data collection XIV–XV.

| Indication                          | X-linked |      | Autosomal recessive |      | Autosomal dominant |      | HLA Only |      | + monogenic disease |      | Other |      | Total  |      |
|-------------------------------------|----------|------|---------------------|------|--------------------|------|----------|------|---------------------|------|-------|------|--------|------|
| Cycles to OR                        | 573      |      | 997                 |      | 1698               |      | 26       |      | 136                 |      | 15    |      | 3445   |      |
| Number infertile                    | 121      |      | 311                 |      | 339                |      | 0        |      | 1                   |      | 9     |      | 781    |      |
| Female age (years)                  | 32.5     |      | 33.7                |      | 32.6               |      | 35.2     |      | 33.2                |      | 33.2  |      | 32.9   |      |
| Cancelled before IVF/ICSI           | 0        |      | 0                   |      | 0                  |      | 0        |      | 0                   |      | 0     |      | 0      |      |
| ART method                          |          |      |                     |      |                    |      |          |      |                     |      |       |      |        |      |
| IVF                                 | 1        |      | 4                   |      | 4                  |      | 5        |      | 14                  |      | 3     |      | 31     |      |
| ICSI                                | 570      |      | 986                 |      | 1691               |      | 20       |      | 122                 |      | 12    |      | 3401   |      |
| ICSI + frozen                       | 2        |      | 7                   |      | 3                  |      | 1        |      |                     |      |       |      | 13     |      |
| Cancelled after IVF/ICSI            | 5        |      | 10                  |      | 27                 |      | 0        |      | 1                   |      | 0     |      | 43     |      |
| Cycles to PGD                       | 568      |      | 987                 |      | 1671               |      | 26       |      | 135                 |      | 15    |      | 3402   |      |
| Zona breaching                      |          |      |                     |      |                    |      |          |      |                     |      |       |      |        |      |
| AT drilling                         | 39       |      | 92                  |      | 121                |      |          |      | 9                   |      |       |      | 261    |      |
| Laser drilling                      | 424      |      | 742                 |      | 1410               |      | 26       |      | 124                 |      | 15    |      | 2741   |      |
| Mechanical                          | 105      |      | 153                 |      | 140                |      |          |      | 2                   |      |       |      | 400    |      |
| Biopsy method                       |          |      |                     |      |                    |      |          |      |                     |      |       |      |        |      |
| PB                                  | 53       |      | 19                  |      | 38                 |      |          |      |                     |      |       |      | 110    |      |
| Cleavage aspiration                 | 501      |      | 899                 |      | 1607               |      | 26       |      | 130                 |      | 15    |      | 3178   |      |
| Cleavage extrusion                  |          |      |                     |      | 1                  |      |          |      |                     |      |       |      | 1      |      |
| Blastocyst                          | 7        |      | 40                  |      | 15                 |      |          |      | 5                   |      |       |      | 67     |      |
| PB + embryo                         | 7        |      | 29                  |      | 10                 |      |          |      |                     |      |       |      | 46     |      |
| Biopsy policy                       |          |      |                     |      |                    |      |          |      |                     |      |       |      |        |      |
| 1 cell biopsy                       | 264      |      | 663                 |      | 9939               |      | 22       |      | 86                  |      | 7     |      | 1981   |      |
| 2 cell biopsy                       | 193      |      | 215                 |      | 520                |      | 2        |      | 33                  |      | 6     |      | 969    |      |
| 1 or 2 cell biopsy                  | 81       |      | 55                  |      | 178                |      | 2        |      | 9                   |      | 2     |      | 327    |      |
| > 2 cells (including TE)            | 5        |      | 3                   |      | 2                  |      |          |      | 1                   |      |       |      | 11     |      |
| 1 and 2 polar bodies                | 18       |      | 13                  |      | 20                 |      |          |      | 0                   |      |       |      | 51     |      |
| Unknown                             | 7        |      | 38                  |      | 12                 |      |          |      | 6                   |      |       |      | 63     |      |
| Analysis method <sup>a</sup>        |          |      |                     |      |                    |      |          |      |                     |      |       |      |        |      |
| FISH                                | 13       |      | 14                  |      | 23                 |      |          |      | 6                   |      |       |      | 56     |      |
| PCR                                 | 571      |      | 977                 |      | 1686               |      | 26       |      | 134                 |      | 15    |      | 3409   |      |
| WGA                                 | 23       |      | 85                  |      | 50                 |      |          |      | 2                   |      |       |      | 160    |      |
| arrayCGH                            | 3        |      | 18                  |      | 9                  |      |          |      |                     |      |       |      | 30     |      |
| Embryology                          |          |      |                     |      |                    |      |          |      |                     |      |       |      |        |      |
| COCs (mean/OR)                      | 7225     | 12.6 | 13 327              | 13.4 | 21 845             | 12.9 | 369      | 14.2 | 1852                | 13.6 | 153   | 10.2 | 44 771 | 13.0 |
| Inseminated (mean/OR)               | 5983     | 10.4 | 10 904              | 11.0 | 17 953             | 10.6 | 281      | 10.8 | 1451                | 10.7 | 130   | 8.7  | 36 702 | 10.7 |
| Fertilized (mean/OR)                | 4506     | 7.9  | 8342                | 8.4  | 13 639             | 8.1  | 239      | 9.2  | 1174                | 8.6  | 101   | 6.7  | 28 001 | 8.1  |
| Biopsied (mean/biopsy)              | 3494     | 6.2  | 6332                | 6.4  | 10 989             | 6.6  | 166      | 6.4  | 968                 | 7.2  | 91    | 6.1  | 22 040 | 6.5  |
| Successfully biopsied (mean/biopsy) | 3336     | 5.9  | 6169                | 6.3  | 10 758             | 6.4  | 166      | 6.4  | 964                 | 7.1  | 89    | 5.9  | 21 482 | 6.3  |
| Diagnosed (mean/biopsy)             | 3035     | 5.3  | 5506                | 5.6  | 9949               | 6.0  | 154      | 5.9  | 879                 | 6.5  | 85    | 5.7  | 19 608 | 5.8  |
| Failed (mean/biopsy)                | 202      | 0.4  | 416                 | 0.4  | 642                | 0.4  | 10       | 0.4  | 50                  | 0.4  | 4     | 0.3  | 1324   | 0.4  |
| Abnormal (mean/biopsy)              | 227      | 0.4  | 449                 | 0.5  | 1063               | 0.6  | 24       | 0.9  | 118                 | 0.9  | 15    | 1.0  | 1896   | 0.6  |
| Transferred (mean/biopsy)           | 762      | 1.3  | 1519                | 1.5  | 1944               | 1.1  | 20       | 0.8  | 88                  | 0.7  | 20    | 1.3  | 4353   | 1.3  |
| Frozen                              | 233      |      | 968                 |      | 1007               |      | 10       |      | 148                 |      | 19    |      | 2385   | 0.7  |

Continued

**Table IVb** *Continued*

| Indication                                                 | X-linked |    | Autosomal recessive |    | Autosomal dominant |    | HLA Only |    | + monogenic disease |    | Other |    | Total |       |
|------------------------------------------------------------|----------|----|---------------------|----|--------------------|----|----------|----|---------------------|----|-------|----|-------|-------|
| Clinical outcome                                           |          |    |                     |    |                    |    |          |    |                     |    |       |    |       |       |
| Cycles to ET (%/OR)                                        | 469      | 82 | 851                 | 86 | 1305               | 77 | 15       | 58 | 68                  | 50 | 14    | 93 | 2722  | (79%) |
| hCG Positive                                               | 163      |    | 376                 |    | 516                |    | 6        |    | 24                  |    | 6     |    | 1082  |       |
| Positive heartbeat                                         | 123      |    | 300                 |    | 383                |    | 6        |    | 16                  |    | 6     |    | 834   |       |
| Clinical pregnancy rate (% per OR)                         | 22       |    | 30                  |    | 23                 |    | 23       |    | 12                  |    | 40    |    | 25    |       |
| Clinical pregnancy rate (% per ET)                         | 26       |    | 35                  |    | 29                 |    | 40       |    | 24                  |    | 43    |    | 31    |       |
| Number foetal heartbeats                                   | 141      |    | 370                 |    | 459                |    | 7        |    | 23                  |    | 5     |    | 1005  |       |
| Implantation rate (% foetal hearts/embryos transferred)    | 19       |    | 24                  |    | 24                 |    | 35       |    | 26                  |    | 25    |    | 23    |       |
| Deliveries                                                 | 104      |    | 238                 |    | 337                |    | 6        |    | 14                  |    | 4     |    | 703   |       |
| Delivery rate (% per OR)                                   | 18       |    | 24                  |    | 20                 |    | 23       |    | 10                  |    | 27    |    | 20    |       |
| Delivery rate (% per ET)                                   | 22       |    | 28                  |    | 26                 |    | 40       |    | 20                  |    | 29    |    | 26    |       |
| Miscarriages                                               | 12       |    | 38                  |    | 33                 |    | 0        |    | 2                   |    | 1     |    | 86    |       |
| Miscarriage rate (% per clinical pregn – pregn lost to FU) | 10       |    | 14                  |    | 9                  |    | 0        |    | 12                  |    | 20    |    | 11    |       |
| Clinical pregnancies lost to FU                            | 7        |    | 24                  |    | 13                 |    | 0        |    | 0                   |    | 1     |    | 45    |       |

TE, trophoctoderm.

<sup>a</sup>Sometimes more than one method of analysis per cycle was reported, making the total sum of the section analysis method exceed the number of cycles to PGD.

transferrable, 72% were actually transferred and 17% were frozen. This was in accordance with the cumulative data (Table Va) where 34% (45 090/131 267) of diagnosed embryos were transferable and 74% (33 332/45 090) were used for transfer while 14% were cryopreserved.

Overall, of 6095 cycles that reached OR, 3763 (62%) had an embryo transfer and a positive hCG was obtained in 1488 cycles, with a positive heartbeat in 1261 cycles, yielding a clinical pregnancy rate of 21% per OR or 34% per embryo transfer procedure. This was slightly better than the overall clinical pregnancy rates from data I–XIII (20% per OR and 28% per embryo transfer). There were 816 reported deliveries, and 231 clinical pregnancies were lost to follow-up. The overall delivery rate was 13% per cycle to OR and 22% per cycle to embryo transfer. The overall miscarriage rate per clinical pregnancy was 21% for all indications, ranging from 8% for advanced maternal age combined with severe male factor or oocyte donation and severe male factor to 35% for advanced maternal age in combination with repeated IVF failure.

## PGD cycles for social sexing

The number of reported cycles for social sexing in data XIV–XV was similar to previous data collections, accounting for less than 1% (38/11 675) of all cycles submitted. Details on 705 cycles for social sexing were reported in data I–XII. Because social sexing as an indication for PGD is debatable, from data XIII onwards, only cycle numbers were included in the reports.

## Pregnancies and babies

Tables VIIa, VIIb, IXa, IXb, Xa, Xb, XIa, XIb and the Supplementary Tables SVIIIa, SVIIIb, SXIIa and SXIIb summarize the pregnancy and baby

data. Data XIV–XV included 2147 clinical pregnancies (Table VIIb) with 1755 deliveries of 19 stillborns and 2066 liveborns. The number of multiple pregnancies remained high (427/2147, 20%—Table VIIb); which is in accordance with previously published data collections. Of the 2147 clinical pregnancies presenting with a positive heartbeat, follow-up data on 1231 pregnancies were reported. There were 91/1231 complications in pregnancy reported (Supplementary Table SVIIIb). The delivery rates per indication were reported in Tables IIb, IIIb, IVb, Vb and VIb. Caesarean section was performed for 44% of the deliveries (765/1755) (Table IXb). In 315 cases, the method of delivery was not known. Confirmation of the diagnosis was performed prenatally in 506 cases, and/or post-natally in 590 cases (Table Xb). In 10 cases, a chromosomal abnormality was found, not related to the indication for PGD. Table Xb and Supplementary Table SXIIb describe the data on congenital malformations, neonatal complications and perinatal deaths. In 1585 out of 2066 cases (77%) the information on malformations found during pregnancy was lacking, and in 1674 out of 2066 liveborns (81%) the information on neonatal malformations was lacking. In 26 out of 481 cases (5%), a minor- and/or major-malformation(s) was reported. Of these cases, 11 resulted in termination of pregnancy (TOP). In 6% of the reported cases a neonatal complication occurred (Supplementary Table SXIIb).

Unfortunately, the organization of adequate children follow-up is even more difficult than the follow-up of the clinical pregnancies. However, follow-up of the children born after PGD remains of great importance.

## Misdiagnoses

Table XIIIa summarizes the misdiagnoses reported for data I–XIII, with no misdiagnoses reported in data X, data XI and the current dataset.

**Table Va** Cycles performed for PGS, data collection I–XIII.

| Indication                                     | AMA    | AMA +<br>miscarriage | AMA<br>+<br>RIFI | Recurrent<br>miscarriage | Recurrent<br>IVF failure | Severe<br>male<br>factor | Oocyte<br>donation | Prev<br>abn<br>preg | No<br>indication | Other  | Total   |
|------------------------------------------------|--------|----------------------|------------------|--------------------------|--------------------------|--------------------------|--------------------|---------------------|------------------|--------|---------|
| Cycles to OR                                   | 9054   | 1213                 | 2602             | 3352                     | 5621                     | 2387                     | 341                | 164                 | 675              | 1328   | 26 737  |
| Number infertile                               | 6974   | 804                  | 2427             | 1718                     | 5286                     | 2124                     | 271                | 54                  | 634              | 1128   | 21 420  |
| Female age (years)                             | 41     | 40                   | 41               | 34                       | 34                       | 35                       | 39                 | 37                  | 35               | 36     | 37      |
| Cancelled before IVF/ICSI                      | 0      | 0                    | 0                | 0                        | 1                        | 0                        | 0                  | 0                   | 0                | 1      | 2       |
| ART method                                     |        |                      |                  |                          |                          |                          |                    |                     |                  |        |         |
| IVF                                            | 1175   | 235                  | 390              | 323                      | 426                      | 12                       | 4                  | 14                  | 148              | 116    | 2843    |
| ICSI                                           | 7748   | 953                  | 2184             | 2936                     | 5084                     | 2322                     | 334                | 150                 | 469              | 1169   | 23 349  |
| IVF + ICSI                                     | 102    | 17                   | 17               | 73                       | 67                       | 41                       | 3                  | 0                   | 57               | 26     | 403     |
| IVF + frozen                                   | 0      | 2                    | 1                | 1                        | 1                        | 1                        | 0                  | 0                   | 0                | 0      | 6       |
| ICSI + Frozen                                  | 22     | 6                    | 5                | 18                       | 18                       | 11                       | 0                  | 0                   | 1                | 2      | 83      |
| Unknown                                        | 7      | 0                    | 5                | 1                        | 24                       | 0                        | 0                  | 0                   | 0                | 14     | 51      |
| Cancelled after IVF/ICSI                       | 186    | 26                   | 10               | 44                       | 128                      | 35                       | 0                  | 0                   | 27               | 24     | 480     |
| Cycles to PGS                                  | 8868   | 1187                 | 2592             | 3308                     | 5492                     | 2352                     | 341                | 164                 | 648              | 1303   | 26 255  |
| Zona breaching                                 |        |                      |                  |                          |                          |                          |                    |                     |                  |        |         |
| AT drilling                                    | 1746   | 217                  | 633              | 953                      | 1366                     | 827                      | 38                 | 36                  | 278              | 399    | 6493    |
| Laser drilling                                 | 6690   | 841                  | 1490             | 2214                     | 3418                     | 1227                     | 191                | 128                 | 321              | 851    | 17 371  |
| Mechanical                                     | 419    | 129                  | 469              | 140                      | 671                      | 298                      | 112                | 0                   | 49               | 39     | 2326    |
| Unknown                                        | 13     | 0                    | 0                | 1                        | 37                       | 0                        | 0                  | 0                   | 0                | 14     | 65      |
| Biopsy method                                  |        |                      |                  |                          |                          |                          |                    |                     |                  |        |         |
| PB                                             | 1616   | 470                  | 1516             | 236                      | 942                      | 39                       | 0                  | 1                   | 151              | 268    | 5239    |
| Cleavage aspiration                            | 6854   | 674                  | 994              | 2931                     | 4253                     | 2227                     | 247                | 154                 | 488              | 1000   | 19 822  |
| Cleavage extrusion                             | 367    | 34                   | 77               | 114                      | 239                      | 80                       | 94                 | 3                   | 3                | 30     | 1041    |
| Cleavage flow displacement                     | 7      | 0                    | 0                | 3                        | 7                        | 1                        | 0                  | 0                   | 0                | 4      | 22      |
| Blastocyst                                     | 3      | 6                    | 2                | 22                       | 10                       | 3                        | 0                  | 6                   | 1                | 1      | 54      |
| PB + embryo                                    | 9      | 3                    | 3                | 1                        | 3                        | 2                        | 0                  | 0                   | 5                | 0      | 26      |
| Unknown                                        | 13     | 0                    | 0                | 1                        | 38                       | 0                        | 0                  | 0                   | 0                | 0      | 52      |
| Embryology                                     |        |                      |                  |                          |                          |                          |                    |                     |                  |        |         |
| COC's                                          | 86 910 | 11 378               | 23 778           | 41 713                   | 71 867                   | 34 040                   | 4356               | 1846                | 7570             | 16 746 | 300 204 |
| Inseminated                                    | 73 526 | 9409                 | 18 767           | 34 528                   | 58 732                   | 27 621                   | 3758               | 1551                | 6506             | 14 035 | 248 433 |
| Fertilized                                     | 51 686 | 6691                 | 13 018           | 25 494                   | 42 376                   | 19 445                   | 2849               | 1160                | 4533             | 9994   | 177 246 |
| Biopsied                                       | 40 124 | 6003                 | 13 306           | 19 343                   | 33 823                   | 14 637                   | 2144               | 867                 | 3691             | 7879   | 141 817 |
| Successfully biopsied                          | 39 725 | 5968                 | 13 206           | 19 174                   | 33 396                   | 14 575                   | 2137               | 858                 | 3640             | 7814   | 140 493 |
| Diagnosed                                      | 37 064 | 5601                 | 12 227           | 17 928                   | 31 442                   | 13 776                   | 2 084              | 811                 | 3269             | 7065   | 131 267 |
| Transferable                                   | 10 208 | 1519                 | 3930             | 6532                     | 11 777                   | 5529                     | 992                | 323                 | 1435             | 2845   | 45 090  |
| Transferred                                    | 8777   | 1283                 | 3316             | 4550                     | 8120                     | 3603                     | 559                | 205                 | 930              | 1989   | 33 332  |
| Frozen                                         | 1089   | 147                  | 397              | 1008                     | 1646                     | 736                      | 269                | 87                  | 180              | 531    | 6090    |
| Clinical outcome                               |        |                      |                  |                          |                          |                          |                    |                     |                  |        |         |
| Cycles to ET                                   | 5416   | 792                  | 1916             | 2567                     | 4431                     | 1977                     | 302                | 126                 | 527              | 1063   | 19 117  |
| HCG positive                                   | 1625   | 229                  | 459              | 1092                     | 1617                     | 859                      | 166                | 58                  | 216              | 447    | 6768    |
| Positive heartbeat                             | 1250   | 177                  | 366              | 868                      | 1262                     | 724                      | 138                | 50                  | 180              | 345    | 5360    |
| Clinical pregnancy rate<br>(% per OR/% per ET) | 14/23  | 15/22                | 14/19            | 26/34                    | 22/28                    | 30/37                    | 40/46              | 30/40               | 27/34            | 26/32  | 20/28   |

AMA, advanced maternal age; RIFI, repeated implantation failure; SMF, severe male factor; Prev abn preg, previous abnormal pregnancy.

**Table Vb** Cycles performed for PGS, data collection XIV–XV.

| Indication                | AMA <sup>a</sup> | AMA +<br>Rec misc <sup>b</sup> | AMA +<br>RIF <sup>c</sup> | Rec.<br>Misc <sup>d</sup> | RIF <sup>e</sup> | RIF +<br>Rec | SMF <sup>f</sup> | Prev<br>abn<br>preg <sup>f</sup> | RIF +<br>SMF | AMA +<br>SMF | NumAbno <sup>f</sup> | NO<br>indic | Ovum<br>donat | Ovum donat +<br>SMF | Total  |
|---------------------------|------------------|--------------------------------|---------------------------|---------------------------|------------------|--------------|------------------|----------------------------------|--------------|--------------|----------------------|-------------|---------------|---------------------|--------|
| Cycles to OR              | 2471             | 312                            | 727                       | 592                       | 754              | 32           | 531              | 56                               | 49           | 91           | 168                  | 181         | 76            | 55                  | 6095   |
| Number infertile          | 1125             | 96                             | 440                       | 158                       | 598              | 9            | 471              | 25                               | 46           | 64           | 160                  | 113         | 71            | 44                  | 3420   |
| Female age (years)        | 41.2             | 41.1                           | 39.9                      | 36.3                      | 35.9             | 36.9         | 35.4             | 37.6                             | 35.5         | 40.8         | 39.5                 | 40.5        | 40.9          | 41.6                | 39.2   |
| ART method                |                  |                                |                           |                           |                  |              |                  |                                  |              |              |                      |             |               |                     |        |
| IVF                       | 279              | 41                             | 113                       | 25                        | 40               | 2            | 2                | 3                                | 2            | 1            | 5                    | 32          | 0             | 0                   | 545    |
| ICSI                      | 2164             | 266                            | 608                       | 553                       | 708              | 30           | 521              | 53                               | 45           | 90           | 160                  | 147         | 76            | 55                  | 5476   |
| IVF + ICSI                | 21               | 1                              | 0                         | 7                         | 4                | 0            | 7                | 0                                | 0            | 0            | 3                    | 2           | 0             | 0                   | 45     |
| ICSI + frozen             | 2                | 4                              | 3                         | 6                         | 0                | 0            | 0                | 0                                | 0            | 0            | 0                    | 0           | 0             | 0                   | 15     |
| IVF + frozen              | 0                | 0                              | 0                         | 0                         | 0                | 0            | 0                | 0                                | 0            | 0            | 0                    | 0           | 0             | 0                   | 0      |
| Unknown                   | 5                | 0                              | 3                         | 1                         | 2                | 0            | 1                | 0                                | 1            | 0            | 0                    | 0           | 0             | 0                   | 13     |
| Unknown + frozen          | 0                | 0                              | 0                         | 0                         | 0                | 0            | 0                | 0                                | 1            | 0            | 0                    | 0           | 0             | 0                   | 1      |
| Cancelled post OR         | 13               | 0                              | 0                         | 0                         | 0                | 0            | 3                | 0                                | 0            | 0            | 0                    | 11          | 0             | 0                   | 27     |
| Cycles to PGD             | 2458             | 312                            | 727                       | 592                       | 754              | 32           | 528              | 56                               | 49           | 91           | 168                  | 170         | 76            | 55                  | 6068   |
| Zona breaching            |                  |                                |                           |                           |                  |              |                  |                                  |              |              |                      |             |               |                     |        |
| AT drilling               | 107              | 26                             | 154                       | 48                        | 64               | 1            | 71               | 1                                | 6            | 17           | 38                   | 6           | 5             | 3                   | 547    |
| Laser drilling            | 2197             | 278                            | 552                       | 495                       | 540              | 28           | 354              | 51                               | 32           | 66           | 28                   | 140         | 33            | 52                  | 4846   |
| Mechanical                | 154              | 8                              | 21                        | 49                        | 150              | 3            | 103              | 4                                | 11           | 8            | 102                  | 24          | 38            | 0                   | 675    |
| Biopsy method             |                  |                                |                           |                           |                  |              |                  |                                  |              |              |                      |             |               |                     |        |
| PB                        | 750              | 99                             | 456                       | 89                        | 209              | 7            | 15               | 2                                | 15           | 3            | 6                    | 79          | 0             | 0                   | 1730   |
| Cleavage aspiration       | 1559             | 184                            | 238                       | 462                       | 456              | 20           | 483              | 48                               | 27           | 86           | 158                  | 51          | 41            | 55                  | 3868   |
| Cleavage extrusion        | 41               | 2                              | 18                        | 15                        | 36               | 0            | 21               | 1                                | 3            | 1            | 1                    | 0           | 35            | 0                   | 174    |
| Cleavage low displacement | 17               | 0                              | 4                         | 0                         | 0                | 0            | 0                | 0                                | 0            | 0            | 0                    | 0           | 0             | 0                   | 21     |
| Blastocyst                | 88               | 27                             | 11                        | 25                        | 50               | 5            | 9                | 4                                | 3            | 1            | 3                    | 39          | 0             | 0                   | 265    |
| PB + embryo               | 3                | 0                              | 0                         | 1                         | 3                | 0            | 0                | 1                                | 1            | 0            | 0                    | 1           | 0             | 0                   | 10     |
| Embryology                |                  |                                |                           |                           |                  |              |                  |                                  |              |              |                      |             |               |                     |        |
| COCs                      | 21 911           | 2927                           | 6227                      | 6903                      | 8786             | 399          | 7083             | 586                              | 543          | 1007         | 1815                 | 2112        | 745           | 750                 | 61 794 |
| Inseminated               | 18 770           | 2539                           | 5477                      | 5728                      | 7384             | 322          | 5775             | 498                              | 451          | 822          | 1524                 | 1809        | 687           | 708                 | 52 494 |
| Fertilized                | 13 604           | 1858                           | 3804                      | 4345                      | 5558             | 259          | 4225             | 387                              | 327          | 576          | 1149                 | 1326        | 556           | 536                 | 38 510 |
| Biopsied                  | 10 599           | 1508                           | 3489                      | 3316                      | 4265             | 196          | 3186             | 288                              | 250          | 448          | 849                  | 897         | 442           | 433                 | 30 166 |
| Successfully biopsied     | 10 552           | 1503                           | 3477                      | 3306                      | 4252             | 196          | 3171             | 287                              | 249          | 448          | 849                  | 884         | 441           | 429                 | 30 044 |
| Diagnosed                 | 10 177           | 1417                           | 3270                      | 3165                      | 4034             | 183          | 3046             | 281                              | 243          | 432          | 841                  | 835         | 416           | 405                 | 28 745 |
| Transferable              | 2111             | 323                            | 701                       | 1064                      | 1366             | 64           | 1137             | 82                               | 76           | 91           | 304                  | 306         | 208           | 137                 | 7970   |
| Transferred               | 1739             | 257                            | 640                       | 685                       | 896              | 35           | 666              | 56                               | 48           | 79           | 219                  | 211         | 109           | 78                  | 5718   |

|                                                                   |       |       |       |       |       |       |       |       |       |       |       |       |         |       |       |
|-------------------------------------------------------------------|-------|-------|-------|-------|-------|-------|-------|-------|-------|-------|-------|-------|---------|-------|-------|
| Frozen                                                            | 249   | 77    | 103   | 206   | 264   | 16    | 214   | 15    | 15    | 5     | 39    | 89    | 48      | 31    | 1371  |
| Clinical outcome                                                  |       |       |       |       |       |       |       |       |       |       |       |       |         |       |       |
| Cycles to ET                                                      | 1236  | 171   | 428   | 432   | 572   | 23    | 406   | 37    | 33    | 55    | 131   | 132   | 62      | 45    | 3763  |
| hCG positive                                                      | 403   | 65    | 106   | 215   | 243   | 14    | 208   | 22    | 13    | 21    | 69    | 61    | 22      | 26    | 1488  |
| Positive heartbeat                                                | 335   | 54    | 101   | 176   | 203   | 10    | 188   | 19    | 12    | 14    | 52    | 53    | 18      | 26    | 1261  |
| Clinical pregnancy rate<br>(% per OR/% per ET)                    | 14/27 | 17/32 | 14/24 | 30/41 | 27/35 | 31/43 | 35/46 | 34/51 | 24/36 | 15/25 | 31/40 | 29/40 | 24/29   | 47/58 | 21/34 |
| Number of foetal hearts                                           | 369   | 64    | 112   | 212   | 236   | 11    | 206   | 21    | 13    | 14    | 67    | 65    | 19      | 37    | 1446  |
| Implantation rate (% foetal<br>hearts/100 embryos<br>transferred) | 21    | 25    | 18    | 31    | 26    | 31    | 31    | 38    | 27    | 18    | 31    | 31    | 17      | 47    | 25    |
| Deliveries                                                        | 213   | 29    | 53    | 115   | 125   | 9     | 119   | 16    | 8     | 9     | 45    | 41    | 11      | 23    | 816   |
| Delivery rate (% per<br>OR/% per ET)                              | 9/17  | 9/17  | 7/12  | 19/27 | 17/22 | 28/39 | 22/29 | 29/43 | 16/24 | 10/16 | 27/35 | 23/32 | 14.5/18 | 42/51 | 13/22 |
| Miscarriages                                                      | 69    | 15    | 28    | 30    | 26    | 1     | 24    | 3     | 3     | 1     | 5     | 5     | 2       | 2     | 214   |
| Miscarriage rate (% per<br>clinical pregn – pregn lost<br>to FU)  | 24    | 34    | 35    | 21    | 17    | 11    | 17    | 10    | 27    | 8     | 10    | 12    | 15      | 8     | 21    |
| Clinical pregnancies lost<br>to FU                                | 53    | 10    | 20    | 31    | 52    | 0     | 45    | 0     | 1     | 4     | 2     | 7     | 5       | 1     | 231   |

Cycles with a second indication:

<sup>a</sup>23 cycles.

<sup>b</sup>11 cycles.

<sup>c</sup>36 cycles.

<sup>d</sup>43 cycles.

<sup>e</sup>8 cycles.

<sup>f</sup>2 cycles.

**Table VIIa** Evolution of pregnancy, data collection I–XIII.

|                                            | N pregnancies | N foetal sacs   |
|--------------------------------------------|---------------|-----------------|
| Analysis method                            | 10 639        |                 |
| FISH                                       | 7940          |                 |
| PCR                                        | 2490          |                 |
| FISH + PCR                                 | 18            |                 |
| WGA/array                                  | 71            |                 |
| WGA + PCR <sup>a</sup>                     | 102           |                 |
| PCR + Array                                | 16            |                 |
| FISH + Array                               | 2             |                 |
| Subclinical pregnancies <sup>b</sup>       | 1698          |                 |
| Clinical pregnancies with foetal heartbeat | 8810          | 10 912          |
| Singletons                                 | 6642          | 6642            |
| Twins                                      | 1871          | 3742            |
| Triplets                                   | 161           | 483             |
| Quadruplet                                 | 11            | 44              |
| Unknown                                    | 125           | 1               |
| Lost to FU during first trimester          | 131           | 161             |
| First trimester loss                       | 865           | 1083            |
| Miscarriage                                | 973           | 1060            |
| TOP                                        | 18            | 19              |
| Vanishing/miscarriage multiples            | 0             | 215             |
| Reduction of multiple pregnancies          | 0             | 80              |
| Quadruplet to twin                         | 0             | 14              |
| Triplet to twin                            | 0             | 24              |
| Triplet to singleton                       | 0             | 21              |
| Twin to singleton                          | 1144          | 1403            |
| Unknown                                    | 29            | 37 <sup>c</sup> |
| Ongoing pregnancies > 12 weeks             | 6433          | 7974            |
| Second trimester loss                      | 115           | 188             |
| Miscarriage                                | 123           | 162             |
| Miscarriage twin to singleton              | 0             | 4               |
| TOP                                        | 50            | 54              |
| Twin to twin transfusion                   | 1             | 2               |
| Vanishing/miscarriage multiples            |               |                 |
| Reduction of multiple pregnancies          |               | 39              |
| Quadruplet to twin                         |               | 4               |
| Triplet to twin                            |               | 11              |
| Triplet to singleton                       |               | 14              |
| Twin to singleton                          |               | 6               |
| Lost to FU during second trimester         | 1457          | 333             |
| Deliveries                                 | 7134          | 8765            |
| Singletons                                 | 5560          | 5560            |
| Twins                                      | 1517          | 3037            |
| Triplets                                   | 57            | 171             |

TOP, termination of pregnancy.

<sup>a</sup>Data available since data collection XI.<sup>b</sup>Subclinical pregnancy defined as pregnancy without any other clinical signs, but positive serum hCG.<sup>c</sup>Number of foetal heartbeats not known for data I–VIII, counted further as one foetal heart.**Table VIIb** Evolution of pregnancy, data collection XIV–XV.

|                                                          | N pregnancies | N foetal hearts                     |
|----------------------------------------------------------|---------------|-------------------------------------|
| Pregnancies                                              | 3097          |                                     |
| FISH only cycles                                         | 1359          |                                     |
| PCR only cycles                                          | 1014          |                                     |
| Array                                                    | 407           |                                     |
| PCR + WGA                                                | 74            |                                     |
| PCR + Array                                              | 10            |                                     |
| FISH + Array                                             | 0             |                                     |
| FISH + PCR                                               | 8             |                                     |
| Subclinical pregnancies <sup>a</sup> + lost to follow-up | 950           |                                     |
| Clinical pregnancies, with foetal heartbeat              | 2147          | 2600                                |
| Singletons                                               | 1720          | 1720                                |
| Twins                                                    | 403           | 806                                 |
| Triplets                                                 | 22            | 66                                  |
| Quadruplet                                               | 2             | 8                                   |
| First trimester loss                                     |               |                                     |
| Miscarriage                                              | 303           | 408                                 |
| TOP <sup>b</sup>                                         | 1             | 2                                   |
| Vanishing/miscarriage multiples                          |               |                                     |
| Twin to singleton                                        | 32            | 32                                  |
| Triplet to twin                                          | 1             | 1                                   |
| Triplet to singleton                                     | 4             | 8                                   |
| Reduction of multiple pregnancies                        |               |                                     |
| Triplet to twin                                          | 6             |                                     |
| Twin to singleton                                        | 0             | 0                                   |
| Triplet to singleton                                     | 3             | 6                                   |
| Quadruplet to twin                                       | 2             | 2                                   |
| Ongoing pregnancies (> 12 weeks)                         | 1795          | 2135                                |
| Second trimester loss                                    |               |                                     |
| Miscarriage                                              | 33            | 43                                  |
| TOP                                                      | 7             | 7                                   |
| Deliveries                                               | 1755          | 2085 <sup>b</sup> 2066 <sup>c</sup> |
| Singletons                                               | 1429          | 1429 1419                           |
| Twins                                                    | 322           | 644 635                             |
| Triplets                                                 | 4             | 12 12                               |

<sup>a</sup>Subclinical pregnancy (i.e. biochemical and blighted ovum) defined as a pregnancy without any other clinical signs.<sup>b</sup>Liveborns and stillborns.

## Discussion

In order that the data are up to date, this 14th data report of the ESHRE PGD Consortium involves data from two consecutive calendar years instead of a single year. The most time-consuming step in data processing involves data 'cleaning': inconsistent data are clarified or

**Table IXa** Method of delivery and gestational age, data collection I–XIII.

|                       | Total | Singletons | Twins | Triplets |
|-----------------------|-------|------------|-------|----------|
| Number of deliveries  | 7075  | 5514       | 1505  | 56       |
| Method of delivery    |       |            |       |          |
| Vaginal               | 2993  | 2694       | 297   | 2        |
| Caesarian             | 3343  | 2243       | 1053  | 47       |
| Vaginal and Caesarian | 11    | 2          | 9     | 0        |
| Unknown               | 728   | 575        | 146   | 7        |
| Term at delivery      |       |            |       |          |
| Preterm (<37 weeks)   | 1786  | 777        | 968   | 41       |
| Term                  | 4758  | 4333       | 420   | 6        |
| Post term             | 7     | 7          | 0     | 0        |
| Unknown               | 523   | 397        | 116   | 9        |

**Table IXb** Method of delivery and gestational age, data collection XIV–XV.

|                      | Total | Singleton | Twin | Triplet |
|----------------------|-------|-----------|------|---------|
| Number of deliveries | 1755  | 1429      | 322  | 4       |
| Method of delivery   |       |           |      |         |
| Vaginal              | 675   | 616       | 59   | 0       |
| Caesarean            | 765   | 545       | 216  | 4       |
| Unknown              | 315   | 268       | 47   | 0       |
| Term at delivery     |       |           |      |         |
| Preterm (<37 weeks)  | 327   | 140       | 183  | 4       |
| Term                 | 1230  | 1123      | 107  | 0       |
| Unknown              | 198   | 166       | 32   | 0       |

**Table Xa** Confirmation of diagnosis per foetal sac, data collection I–XIII.

| Method             | Result |        |          |        |
|--------------------|--------|--------|----------|--------|
|                    | N      | Normal | Abnormal | Failed |
| Prenatal diagnosis |        |        |          |        |
| Array              |        |        |          |        |
| CVS                | 3      | 3      |          |        |
| Amniocentesis      | 1      | 1      |          |        |
| Ultrasound         | 2      | 2      |          |        |
| Total              | 6      | 6      |          |        |
| FISH               |        |        |          |        |
| CVS                | 158    | 150    | 7        | 1      |
| Amniocentesis      | 925    | 898    | 24       | 3      |
| Ultrasound         | 1508   | 1492   | 15       | 1      |
| Unknown            | 3      | 3      |          |        |
| Total              | 2594   | 2543   | 46       | 5      |

Continued

**Table Xa** Continued

| Method                                 | N    | Result |          |        |
|----------------------------------------|------|--------|----------|--------|
|                                        |      | Normal | Abnormal | Failed |
| PCR                                    |      |        |          |        |
| CVS                                    | 257  | 248    | 9        |        |
| Amniocentesis                          | 376  | 355    | 20       | 1      |
| Ultrasound                             | 64   | 59     | 5        |        |
| Unknown                                | 2    | 2      |          |        |
| Total                                  | 699  | 664    | 34       | 1      |
| PCR + WGA                              |      |        |          |        |
| CVS                                    | 1    | 1      |          |        |
| Amniocentesis                          | 1    | 1      |          |        |
| Total                                  | 2    | 2      |          |        |
| Total Prenatal                         | 3301 | 3215   | 80       | 6      |
| Postnatal diagnosis                    |      |        |          |        |
| Array                                  |      |        |          |        |
| Karyo miscarriage                      | 1    |        |          | 1      |
| Karyo postnatal                        | 1    | 1      |          |        |
| Karyo + physical examination           | 4    | 4      |          |        |
| Total                                  | 6    | 5      |          | 1      |
| FISH                                   |      |        |          |        |
| Karyo miscarriage                      | 134  | 65     | 67       | 2      |
| Karyo postnatal                        | 321  | 314    | 5        | 2      |
| FISH microdeletion                     | 2    | 2      |          |        |
| Physical examination                   | 1951 | 1944   | 7        |        |
| Karyo postnatal + physical examination | 84   | 84     |          |        |
| Karyo postnatal + DNA                  | 1    | 1      |          |        |
| Unknown                                | 3    | 3      |          |        |
| Total                                  | 2496 | 2413   | 79       | 4      |
| PCR                                    |      |        |          |        |
| Karyotype miscarriage                  | 16   | 10     | 4        | 2      |
| DNA test miscarriage                   | 2    | 2      |          |        |
| DNA test postnatal                     | 226  | 224    | 2        |        |
| Sweat test/IRT                         | 19   | 19     |          |        |
| Physical examination                   | 179  | 178    | 1        |        |
| Karyotype                              | 25   | 24     | 1        |        |
| Karyo + DNA                            | 57   | 56     | 1        |        |
| Karyo + phys exam                      | 37   | 37     |          |        |
| Hearing test                           | 3    | 3      |          |        |
| Algo test                              | 2    | 2      |          |        |
| Other                                  | 3    | 3      |          |        |
| Unknown                                | 35   | 35     |          |        |
| Total                                  | 604  | 593    | 9        | 2      |
| FISH + Array                           |      |        |          |        |
| Physical examination                   | 1    | 1      |          |        |
| PCR + WGA                              |      |        |          |        |
| DNA test postnatal                     | 26   | 26     |          |        |
| PCR + Array                            |      |        |          |        |
| Karyo + DNA                            | 1    | 1      |          |        |
| Total Postnatal                        | 3134 | 3039   | 88       | 7      |

CVS, chorionic villus sampling; IRT, immunoreactive trypsinogen test; karyo, karyotype.

**Table Xb** Confirmation of diagnosis per foetal sac, data collection XIV–XV.

| Method               | N   | Result |                |        |
|----------------------|-----|--------|----------------|--------|
|                      |     | Normal | Abnormal       | Failed |
| Prenatal diagnosis   |     |        |                |        |
| Array                |     |        |                |        |
| CVS                  | 4   | 4      | 0              | 0      |
| Amniocentesis        | 7   | 7      | 0              | 0      |
| Ultrasound           | 185 | 185    | 0              | 0      |
| Total                | 196 | 196    | 0              | 0      |
| FISH                 |     |        |                |        |
| CVS                  | 23  | 20     | 3 <sup>a</sup> | 0      |
| Amniocentesis        | 45  | 43     | 2 <sup>b</sup> | 0      |
| Ultrasound           | 134 | 134    | 0              | 0      |
| Total                | 202 | 197    | 5              | 0      |
| PCR                  |     |        |                |        |
| CVS                  | 20  | 18     | 2 <sup>c</sup> | 0      |
| Amniocentesis        | 60  | 57     | 3 <sup>d</sup> | 0      |
| Ultrasound           | 25  | 25     | 0              | 0      |
| Total                | 105 | 100    | 5              | 0      |
| PCR + WGA            |     |        |                |        |
| CVS                  | 1   | 1      | 0              | 0      |
| Ultrasound           | 2   | 2      | 0              | 0      |
| Total                | 3   | 3      | 0              | 0      |
| Postnatal diagnosis  |     |        |                |        |
| Array                |     |        |                |        |
| Karyo                | 2   | 2      | 0              | 0      |
| Physical examination | 246 | 245    | 1 <sup>e</sup> | 0      |
| Total                | 248 | 247    | 1              | 0      |
| FISH                 |     |        |                |        |
| Karyo                | 28  | 28     | 0              | 0      |
| Physical examination | 193 | 193    | 0              | 0      |
| Total                | 221 | 221    | 0              | 0      |
| PCR                  |     |        |                |        |
| Physical examination | 57  | 57     | 0              | 0      |
| DNA test             | 62  | 62     | 0              | 0      |
| Other                | 2   | 2      | 0              | 0      |
| Total                | 121 | 121    | 0              | 0      |

<sup>a</sup>Trisomy 21 (three times).<sup>b</sup>Chromosomal abnormality, not specified. And Trisomy 21.<sup>c</sup>Trisomy 21 and Trisomy 13.<sup>d</sup>Trisomy 21 (twice) and Trisomy 18.<sup>e</sup>Hydrocephalus.

missing data are added following contact between the relevant centre and the science manager of ESHRE. As data analysis had fallen behind, it was decided to reduce this laborious part and omit inconsistent and incomplete data. This is the main reason for the higher percentages of follow-up losses in cycles, pregnancies and children born. This may also explain why the total number of reported cycles has remained constant compared to data XIII, while it is clear from the European

**Table XIa** Data on liveborn children, data collection I–XIII.

| Total children born    | 8453      |
|------------------------|-----------|
| Sex                    |           |
| Male                   | 3929      |
| Female                 | 4166      |
| Unknown                | 358       |
| Mean birthweight (g)   |           |
| Singletons             | 3225 4853 |
| Twins                  | 2489 2856 |
| Triplets               | 1949 115  |
| Mean birth length (cm) |           |
| Singletons             | 50 3273   |
| Twins                  | 46 1549   |
| Triplets               | 45 34     |

Numbers in the right column indicate the number of newborns for whom information is available.

**Table XIb** Data on liveborn children, data collection XIV–XV.

| Total liveborn children      | 2066       |       |                          |
|------------------------------|------------|-------|--------------------------|
| Sex                          |            |       |                          |
| Male                         |            | 963   |                          |
| Female                       |            | 1032  |                          |
| Unknown                      |            | 71    |                          |
| Mean birthweight (g)         | 3112       |       |                          |
| Singletons                   |            | 3440  | (1272/1419) <sup>a</sup> |
| Twins                        |            | 2389  | (568/635) <sup>a</sup>   |
| Triplets                     |            | 2006  | (9/12) <sup>a</sup>      |
| Mean birth length (cm)       | 96.2       |       |                          |
| Singletons                   |            | 102.8 | (930/1419) <sup>a</sup>  |
| Twins                        |            | 76.7  | (306/635) <sup>a</sup>   |
| Triplets                     |            | 45.2  | (6/12) <sup>a</sup>      |
| Mean head circumference (cm) | 63.4       |       |                          |
| Singletons                   |            | 62.2  | (254/1419) <sup>a</sup>  |
| Twins                        |            | 69.7  | (65/635) <sup>a</sup>    |
| Triplets                     |            | 29.7  | (3/12) <sup>a</sup>      |
| Apgar scores after 1 min     | Singletons | Twin  | Triplet                  |
| Good <sup>b</sup>            | 354        | 108   | 3                        |
| Poor <sup>b</sup>            | 26         | 13    | 0                        |
| Apgar scores after 5 min     |            |       |                          |
| Good <sup>b</sup>            | 368        | 115   | 3                        |
| Poor <sup>b</sup>            | 8          | 4     | 0                        |
| Apgar scores after 10 min    |            |       |                          |
| Good <sup>b</sup>            | 185        | 60    | 3                        |
| Poor <sup>b</sup>            | 5          | 3     | 0                        |

<sup>a</sup>Numbers between brackets indicate the number of newborns for whom information is available out of the total number of newborns.

<sup>b</sup>Good is defined  $\geq 7$ , poor is defined  $< 7$ .

**Table XIIIa** Summary of misdiagnosis from data I–XIII (no misdiagnosis reported for data X and XI).

| Indication                                 | Method used | PND-postnatal | Outcome           | Reported in                                 |
|--------------------------------------------|-------------|---------------|-------------------|---------------------------------------------|
| Monogenics                                 |             |               |                   |                                             |
| Myotonic Dystrophy                         | PCR         | PND           | TOP               | I                                           |
| β-thalassaemia                             | PCR         | PND           | TOP               | II                                          |
| β-thalassaemia                             | PCR         | PND           | TOP               | VIII                                        |
| Familial amyloid polyneuropathy            | PCR         | PND           | Born              | IV                                          |
| Cystic fibrosis                            | PCR         | PND           | Born              | II                                          |
| Cystic fibrosis (one of twins)             | PCR         | Post          | Born              | IV                                          |
| Charcot-Marie-Tooth 1A                     | PCR         | PND           | Born              | Cycle reported in V but misdiagnosis in VII |
| Spinal Muscular Atrophy                    | PCR         | Post          | Born              | Cycle reported IV but misdiagnosis in VII   |
| Charcot-Marie-Tooth 1A (twins)             | PCR         | PND           | TOP of both twins | VII                                         |
| Fragile X                                  | PCR         | PND           | Born              | XIII                                        |
| Fragile X                                  | PCR         | PND           | TOP               | VIII                                        |
| Sexing for X-linked disease                |             |               |                   |                                             |
| 46,XY in Retinitis pigmentosa              | PCR         | PND           | Born              | IV                                          |
| 46,XY in Duchenne Muscular Dystrophy twin  | PCR         | PND           | TOP of one twin   | III                                         |
| 45,X, Haemophilia A                        | FISH        | PND           | TOP               | IV                                          |
| 46,XY, Haemophilia A                       | FISH        | Post          | Born              | VIII                                        |
| Translocations                             |             |               |                   |                                             |
| Trisomy 13 after 45,XY,der(13;14)(q10;q10) | FISH        | Miscarried    | Miscarried        | VI                                          |
| 47,XX,+der(22)t(11;22)(q23.3;q11.2)mat     | FISH        | PND           | TOP               | III                                         |
| 46,XY,der(15)t(3;15)(q25.1;q26.3)pat       | FISH        | PND           | TOP               | VII                                         |
| 46,XY,der(17)t(5;17)(p13;p13)mat           | FISH        | PND           | TOP               | XII                                         |
| PGS                                        |             |               |                   |                                             |
| 47,XXX                                     | FISH        | PND           | Lost to follow-up | VII                                         |
| 45,X                                       | FISH        | PND           | Miscarriage       | VIII, reported in IX                        |
| Trisomy 16 after first PB biopsy only      | FISH        | Miscarried    | Miscarried        | VI                                          |
| Trisomy 16 after first PB biopsy only      | FISH        | Miscarried    | Miscarried        | V                                           |
| Trisomy 16                                 | FISH        | Miscarried    | Miscarried        | VI                                          |
| Trisomy 16                                 | FISH        | Miscarried    | Miscarried        | VI                                          |
| Trisomy 21                                 | FISH        | Post          | Born              | III                                         |
| Trisomy 21                                 | FISH        | PND           | TOP               | IX                                          |
| Trisomy 21                                 | FISH        | PND           | TOP               | IX                                          |
| Trisomy 21                                 | FISH        | PND           | TOP               | XIII                                        |
| Trisomy 21                                 | FISH        | Postnatal     | Born              | XIII                                        |
| 46,XY/47,XY+18                             | FISH        | PND           | TOP               | IX                                          |
| 46,XY                                      | FISH        | PND           | Born              | XII                                         |
| Trisomy 21                                 | FISH        | PND           | Miscarried        | XII                                         |
| Social Sexing                              |             |               |                   |                                             |
| Requested male but female foetus           | FISH        | PND           | TOP               | III                                         |

PND, prenatal diagnosis.

IVF-Monitoring ESHRE Consortium data that the number of reported PGD/PGS cycles increased from 6399 (2010) to 6824 (2011) and to 8433 (2012) (Kupka *et al.*, 2014, 2016; Calhaz-Jorge *et al.*, 2016). Another reason, especially true for missing pregnancy and baby data, is that adequate follow-up of these aspects was not in place in many centres. Nevertheless, the number of participating centres (71) was higher than for the previous data collection XIII (62). Data submission is a

time-consuming activity and the steering committee acknowledges the effort of all contributing centres.

Up to data XIII, the number of PGS cycles had increased annually but by 2010 a number of RCTs had clearly demonstrated that routine PGS using FISH at cleavage stage was not beneficial. The number of PGS cycles had decreased from 58% in data XII to 52% in data XIII and it has remained constant for the 2 years of the current data collection.

A consensus was published by the ESHRE PGD Consortium stating that future studies with alternative biopsy timing and genetic testing were necessary to evaluate the clinical benefit of PGS (Harper et al., 2010a). Data XIV–XV showed that genetic testing with genome-wide arrayCGH instead of FISH was applied in 20% of PGS cycles, but this was not yet linked with blastocyst biopsies. The uptake of arrayCGH was also observed in PGD cycles for chromosomal abnormalities, although less prominent than for PGS, and it was associated with the implementation of Day 5–6 biopsies. Techniques such as arrayCGH provide a generic platform, avoiding the need to develop locus- and family-specific tests, but consumables and equipment are expensive. It may take some time before workflows and instruments have been adapted and the personnel have been adequately trained. Turning from Day 3 to Day 5–6 biopsy requires an optimal embryo culture system and may lead to problems of limited time for analysis in case of fresh embryo transfer. This can be overcome by cryopreservation and embryo transfer in a deferred cycle. Again, such strategies require adaptations in laboratory organization and personnel training, explaining why the switch towards genome-wide genetic testing and blastocyst biopsy is not more advanced yet.

No further misdiagnosis cases were reported in this data collection. Although data reporting is anonymous, it may be that centres do not wish to reveal this information. Another explanation may be further improvement of laboratory quality management systems. The preceding years have seen an increased implementation of accreditation together with the first PGD external quality assessment schemes carried out from 2009 onwards (Deans et al., 2013). To date, including all cycles up to data XIV–XV, misdiagnosis has been reported for only 13/12 790 PCR-based cycles, 21/40 640 FISH-based PGD cycles and no data yet on the new genome-wide technologies. As many embryo transfers have no follow-up (no pregnancy or birth), and only a minority of centres perform audit through re-analysis of untransferred/non-cryopreserved supernumerary embryos, the numbers reported in the data collections may not reflect the true misdiagnosis in PGD.

The evaluation and publication of data collections have been lagging. PGD and PGS cycles have become more complex and the FileMaker Pro database system, created before 2000, is no longer adequate to further monitor data and trends in PGD services. Therefore this data collection is the last to be published relying on FileMaker Pro files. The retrospective data from 2013 to 2015 will be published as summary data, while a new platform for prospective data collection has been launched in June 2017 to handle data from 2016 onwards. This on-line platform is analysis-based instead of cycle-based and collects data over the various segments of OR, biopsy, analysis, transfer, pregnancy and babies, taking into account that PGD cycles are no longer carried out within the timeframe of a single procedure.

## Supplementary data

Supplementary data are available at *Human Reproduction* online.

## Acknowledgements

Many thanks also to all of the centres who participated in data collection XIV–XV. Argentina: Fertility - Centro de Fertilização Assis; Austria: Landes-Frauen und Kinderklinik Linz, Human Genetics; Belgium:

Department of Embryology and Genetics of the VUB and Centre for Medical Genetics of the Universitair Ziekenhuis Brussels; Hospital Erasme, ULB, Laboratoire FIV; Leuven Institute for Fertility and Embryology; Leuven University Fertility Centre; Brazil: Fertility-Assisted Reproductive Centre, Sao Paulo; Canada: Mount Sinai Hospital, Pathology and Laboratory Medicine; Cyprus: The Cyprus Institute of Neurology and Genetics, Molecular Genetics Thalassemia Department; Czech Republic: Sanatorium Repromeda; Institute Pronatal, Genetics; Denmark: Centre for preimplantation genetic diagnosis, Fertility clinic, Aalborg University Hospital; Fertility Clinic, University of Odense; Finland: Helsinki University Central Hospital, Department of Obstetrics & Gynaecology/IVF Unit; France: Hôpitaux Universitaires de Strasbourg, Laboratoire de Diagnostic préimplantatoire; Institut Universitaire de Recherche Clinique, Laboratoire de Génétique Moléculaire; Germany: University of Bonn, Department of Obstetrics & Gynaecology, Section of Reproductive Medicine; Zentrum Für Humangenetik, Humangenetisches Labor; University Clinic of Schleswig-Holstein, Campus Luebeck, Department of Obstetrics and Gynecology; Fertility Center Hamburg; Kinderwunschzentrum München; Gyn-Gen-Lehel München; Kinderwunschzentrum an der Gedächteniskirche; PAN Klinik am Neumarkt; Greece: IVF & Genetics; University of Athens, St. Sophia's Children's Hosp, Laboratory of Medical Genetics; EMBRYOGENESIS, Centre for Subfertility Studies; Interbalkan Medical Centre, IVF and Infertility Centre; Reproductive Medicine Unit, Genesis Athens Clinic; Embryolab; Hungary: Versys Clinics Human Reproduction Institute; India: Krishna IVF Clinic; Israel: Lis Maternity Hospital, dept. of IVF; Institute of Human Genetic, Sheba Medical Centre; Zohar PGD lab, Medical Genetics Unit; Italy: SISMER; HERA, Unita di Medicina della Riproduzione; Reproductive Medicine, European Hospital; FertiClinic; GENERA, reproductive medicine centres; Japan: Kato Ladies Clinic Perinatal Genetics; St. Mother Hospital; St. Luke Clinic; Korea: Cheil General Hospital & Women's Healthcare Center, Kwadong University, College of Medicine, Dept. of Ob/Gyn; Poland: INVICTA Fertility and Reproductive Centre; Portugal: Faculty of Medicine of Porto—Hospital S. Joao, Department of Medical Genetics; Singapore: Centre for Assisted Reproduction (CARE); Spain: Instituto Dexeus; Instituto Valenciano de Infertilidad; Institut Marquès, Servei de Diagnostic Genètic Preimplantacional; Sistemas Genomicos SL Valencia; Instituto de Reproduccion CEFER; Hospital Quiron Madrid, Laboratorio de Reproduccion Asistida; Clinica Belén—GINEFIV, IVF lab/Genetics; Clinica GINEFIV; IVI Madrid, Embryology-PGD; Fundacion Puigvert, Seminologia i Reproduccion; Sweden: Department of Clinical Genetics, Karolinska Hospital; Sahlgrenska University Hospital, Department of Ob/Gyn; Taiwan: Chang Gung Memorial Hospital & Medical College, Department Of Ob/Gyn; The Netherlands: PGD working group Maastricht, The Centre for Reproductive Medicine, Department of Obstetrics and Gynaecology, Sub-department Infertility, and Department of Clinical Genetics; University Medical Centre Utrecht; Turkey: Istanbul Memorial Hospital, reproductive endocrinology & ART centre; UK: University College—Medical School, UCL Centre for PGD—EGA Institute for Womens Health; St. Thomas' Hospital, Academic Department of Women's Health; Hammersmith Hospital, Institute of Ob/Gyn—RPMS; Glasgow Royal Infirmary; Royal Edingburgh Infirmary, Edingburgh Fertility and Reproductive Endocrine Centre; Ukraine: Clinic of Reproductive Medicine 'Nadiya'; USA: Jones Inst. for Reproductive Medicine; Reproductive Biology associates.

## Authors' roles

V.G. was responsible for raw data curation and editing of the tables and manuscript; G.K. was responsible for preparing the tables and text of the PGS section; E.C. prepared the tables and text of the section about structural chromosomal abnormalities and sexing for X-linked diseases; M.H.-H. contributed to the tables and text about the pregnancies and babies. C.M. prepared the cumulative tables and made adaptations to the FileMakerPro database; M.D.R. contributed to the tables and text for the section about monogenic disorders, prepared overall data analysis and the discussion section and was responsible for final editing of the main text and tables. All authors revised the final manuscript.

## Funding

No external funding was either sought or obtained for this study.

## Conflict of interest

None declared.

## References

- Deans Z, Fiorentino F, Biricik A, Traeger-Synodinos J, Moutou C, De Rycke M, Renwick P, Sengupta S, Goossens V, Harton G. The experience of 3 years of external quality assessment of preimplantation genetic diagnosis for cystic fibrosis. *Eur J Hum Genet* 2013;**21**:800–806.
- De Rycke M, Belda F, Goossens V, Moutou C, SenGupta SB, Traeger-Synodinos J, Coonen E. ESHRE PGD Consortium data collection XIII: cycles from January to December 2010 with pregnancy follow-up to October 2011. *Hum Reprod* 2015;**30**:1763–1789.
- ESHRE PGD Consortium Steering Committee. ESHRE Preimplantation Genetic Diagnosis Consortium: data collection III (May 2001). *Hum Reprod* 2002;**17**:233–246.
- Geraedts J, Handyside A, Harper J, Liebaers I, Sermon K, Staessen C, Thornhill A, Vanderfaellie A, Viville S. ESHRE Preimplantation Genetic Diagnosis (PGD) Consortium: preliminary assessment of data from January 1997 to September 1998. ESHRE PGD Consortium Steering Committee. *Hum Reprod* 1999;**14**:3138–3148.
- Geraedts J, Handyside A, Harper J, Liebaers I, Sermon K, Staessen C, Thornhill A, Viville S, Wilton L, and the ESHRE PGD Consortium Steering Committee. ESHRE Preimplantation Genetic Diagnosis (PGD) Consortium: data collection II (May 2000). *Hum Reprod* 2000;**15**:2673–2683.
- Goossens V, Harton G, Moutou C, Scriven PN, Traeger-Synodinos J, Sermon K, Harper JC. ESHRE PGD Consortium data collection VIII: cycles from January to December 2005 with pregnancy follow-up to October 2005. *Hum Reprod* 2008;**23**:2629–2645.
- Goossens V, Harton G, Moutou C, Traeger-Synodinos J, Van Rij M, Harper JC. ESHRE PGD Consortium data collection IX: cycles from January to December 2006 with pregnancy follow-up to October 2007. *Hum Reprod* 2009;**24**:1786–1810.
- Goossens V, Traeger-Synodinos J, Coonen E, De Rycke M, Moutou C, Pehlivan T, Derks-Smeets IA, Harton G, ESHRE PGD Consortium data collection XI: cycles from January to December 2008 with pregnancy follow-up to October 2009. *Hum Reprod* 2012;**27**:1887–1911.
- Harper JC, Boelaert K, Geraedts J, Harton G, Kearns WG, Moutou C, Muntjewerff N, Repping S, SenGupta S, Scriven PN et al. ESHRE PGD Consortium data collection V: cycles from January to December 2002 with pregnancy follow-up to October 2003. *Hum Reprod* 2006;**21**:3–21.
- Harper JC, de Die-Smulders C, Goossens V, Harton G, Moutou C, Repping S, Scriven PN, SenGupta S, Traeger-Synodinos J, Van Rij MC et al. ESHRE PGD Consortium data collection VII: cycles from January to December 2004 with pregnancy follow-up to October 2005. *Hum Reprod* 2008b;**23**:741–755.
- Harper J, Coonen E, De Rycke M, Fiorentino F, Geraedts J, Goossens V, Harton G, Pehlivan Budak T, Renwick P, Sengupta S et al. What next for preimplantation genetic screening (PGS)? A position statement from the ESHRE PGD Consortium steering committee. *Hum Reprod* 2010a;**25**:821–823.
- Harper JC, Coonen E, De Rycke M, Harton G, Moutou C, Pehlivan T, Traeger-Synodinos J, Van Rij M, Goossens V, ESHRE PGD Consortium: data collection X: cycles from January to December 2007 with pregnancy follow-up to October 2008. *Hum Reprod* 2010b;**25**:2685–2707.
- Harper JC, Wilton L, Traeger-Synodinos J, Goossens V, Moutou C, SenGupta S, Pehlivan Budak T, Renwick P, De Rycke M, Geraedts J et al. The ESHRE PGD Consortium: ten years of data collection. Running title: 10 years of PGD data. *Hum Reprod Update* 2012;**18**:234–247.
- Harton G, Braude P, Lashwood A, Schmutzler A, Traeger-Synodinos J, Wilton L, Harper JC. European Society for Human Reproduction and Embryology (ESHRE) PGD Consortium. ESHRE PGD consortium best practice guidelines for organization of a PGD centre for PGD/preimplantation genetic screening. *Hum Reprod* 2011a;**26**:14–24.
- Harton GL, Harper JC, Coonen E, Pehlivan T, Vesela K, Wilton L. European Society for Human Reproduction and Embryology (ESHRE) PGD Consortium. ESHRE PGD consortium best practice guidelines for fluorescence in situ hybridization-based PGD. *Hum Reprod* 2011b;**26**:25–32.
- Harton GL, De Rycke M, Fiorentino F, Moutou C, SenGupta S, Traeger-Synodinos J, Harper JC, European Society for Human Reproduction and Embryology (ESHRE) PGD Consortium. ESHRE PGD consortium best practice guidelines for amplification-based PGD. *Hum Reprod* 2011c;**26**:33–40.
- Harton GL, Magli MC, Lundin K, Montag M, Lemmen J, Harper JC, European Society for Human Reproduction and Embryology (ESHRE) PGD Consortium/Embryology Special Interest Group. ESHRE PGD Consortium/Embryology Special Interest Group—best practice guidelines for polar body and embryo biopsy for preimplantation genetic diagnosis/screening (PGD/PGS). *Hum Reprod* 2011d;**26**:41–46.
- Kupka MS, Ferraretti AP, de Mouzon J, Erb K, D'Hooghe T, Castilla JA, Calhaz-Jorge C, De Geyter C, Goossens V, European IVF-Monitoring Consortium, for the European Society of Human Reproduction and Embryology. Assisted reproductive technology in Europe, 2010: results generated from European registers by ESHRE†. *Hum Reprod* 2014;**29**:2099–2113.
- Kupka MS, D'Hooghe T, Ferraretti AP, de Mouzon J, Erb K, Castilla JA, Calhaz-Jorge C, De Geyter CH, Goossens V. European IVF-Monitoring Consortium (EIM); European Society of Human Reproduction and Embryology (ESHRE); Assisted reproductive technology in Europe, 2011: results generated from European registers by ESHRE. *Hum Reprod* 2016;**31**:233–248.
- Calhaz-Jorge C, de Geyter C, Kupka MS, de Mouzon J, Erb K, Mocanu E, Motrenko T, Scaravelli G, Wyns C, Goossens V. European IVF-Monitoring Consortium (EIM) for the European Society of Human Reproduction and Embryology (ESHRE); Assisted reproductive technology in Europe, 2012: results generated from European registers by ESHRE. *Hum Reprod* 2016;**31**:1638–1652.
- Moutou C, Goossens V, Coonen E, De Rycke M, Kokkali G, Renwick P, SenGupta SB, Vesela K, Traeger-Synodinos J, ESHRE PGD Consortium

- data collection XII: cycles from January to December 2009 with pregnancy follow-up to October 2010. *Hum Reprod* 2014;**29**:880–903.
- Sermon K, Moutou C, Harper J, Geraedts J, Scriven P, Wilton L, Magli MC, Michiels A, Viville S, De Die C. ESHRE PGD Consortium data collection IV: May–December 2001. *Hum Reprod* 2005;**20**:19–34.
- Sermon KD, Michiels A, Harton G, Moutou C, Repping S, Scriven PN, SenGupta S, Traeger-Synodinos J, Vesela K, Viville S et al. ESHRE PGD Consortium data collection VI: cycles from January to December 2003 with pregnancy follow-up to October 2004. *Hum Reprod* 2007;**22**:323–336.
